# Supplementary material for: Specificity of SNP detection with molecular beacons is improved by stem and loop separation with spacers
Source: Royal Society of Chemistry journal article supplement (doi:10.1039/c6an02441f), 2017-01-01
Supplement: c6an02441f1.pdf [file c6an02441f1.pdf]

## Specificity of SNP detection with molecular beacons is improved by stem and loop separation with spacers

Valentina M. Farzan,<sup>a,b</sup> Mikhail L. Markelov,<sup>c</sup> Alexander Yu. Skoblov,<sup>d</sup> German A. Shipulin,<sup>b</sup>  
Timofei S. Zatsepin<sup>a,b,e,\*</sup>

<sup>a</sup> Skolkovo Institute of Science and Technology, 3 Nobel street, Innovation Center “Skolkovo”,  
143026 Skolkovo, Russia

<sup>b</sup> Central Research Institute of Epidemiology, Novogireevskaya 3a, 111123 Moscow, Russia

<sup>c</sup> Research Institute of Occupational Health, Prospekt Budenogo 31, 105275 Moscow, Russia

<sup>d</sup> Metkinen Chemistry Oy., Microkatu 1, MicroTower Part-M, FI-70210 Kuopio, Finland

<sup>e</sup> Department of Chemistry, Lomonosov Moscow State University, Leninskie Gory 1-3, 119992  
Moscow, Russia

\* Corresponding author. Tel/fax +(7)495-939-5411. E-mail address: t.zatsepin@skoltech.ru

**Table S1.** Primers used in the study.

| No | Name    | Sequence (5'-3')                          |
|----|---------|-------------------------------------------|
| 1  | FV-F    | CGC CTC TGG GCT AAT AGG ACT ACT TCT AAT C |
| 2  | FV-R    | CAT GTT CTA GCC AGA AG                    |
| 3  | Nos3-F  | ACT CCC CAC AGC TCT GCA TTC AGC AC        |
| 4  | NOS-R   | CAG GGG CAC CTC AAG                       |
| 5  | ADRB2-F | CCA GCC AGT GCG CTC ACC TGC CA            |
| 6  | ADRB2-R | GAC GAT GAG AGA CAT GA                    |

**Table S2.** Probes used in the study. Data of MS analysis.

| Name         | Sequence (5'3')                                                               | Exp. mass | Calc. mass |
|--------------|-------------------------------------------------------------------------------|-----------|------------|
| b0-adrb2-Fam | Fam <i>CCgg</i> ACC CAA TGG AAG CC <i>CCgg</i> BHQ1                           | 7800.8    | 7805.3     |
| b0-adrb2-Hex | Hex <i>CCgg</i> ACC CAA TAG AAG CCA <i>CCgg</i> BHQ1                          | 8320.9    | 8323.1     |
| b0-adrb2-R6G | R6G <i>CCgg</i> ACC CAA TAG AAG CCA <i>CCgg</i> BHQ1                          | 8180.0    | 8183.3     |
| b1-adrb2-Fam | Fam <i>CCgg</i> dIdIdI ACC CAA TGG AAG CC dIdIdI <i>CCgg</i> BHQ1             | 9685.0    | 9689.5     |
| b1-adrb2-Hex | Hex <i>CCgg</i> dIdIdI ACC CAA TAG AAG CCA dIdI <i>CCgg</i> BHQ1              | 9891.0    | 9893.3     |
| b2-adrb2-Fam | Fam <i>CCgg</i> dIdIdI ACC CAA TGG AAG CC <i>CCgg</i> BHQ1                    | 8742.8    | 8747.3     |
| b2-adrb2-Hex | Hex <i>CCgg</i> dIdIdI ACC CAA TAG AAG CCA <i>CCgg</i> BHQ1                   | 9263.1    | 9265.2     |
| b3-adrb2-Fam | Fam <i>CCgg</i> ACC CAA TGG AAG CC dIdIdI <i>CCgg</i> BHQ1                    | 8743.0    | 8747.3     |
| b3-adrb2-Hex | Hex <i>CCgg</i> ACC CAA TAG AAG CCA dIdI <i>CCgg</i> BHQ1                     | 8949.0    | 8951.2     |
| b4-adrb2-Fam | Fam <i>CCgg</i> <i>Sp18</i> ACC CAA TGG AAG CC <i>Sp18</i> <i>CCgg</i> BHQ1   | 8488.8    | 8489.6     |
| b4-adrb2-Hex | Hex <i>CCgg</i> <i>Sp18</i> ACC CAA TAG AAG CCA <i>Sp18</i> <i>CCgg</i> BHQ1  | 9008.8    | 9003.4     |
| b5-adrb2-Fam | Fam <i>CCgg</i> <i>Sp18</i> ACC CAA TGG AAG CC <i>CCgg</i> BHQ1               | 8144.9    | 8145.4     |
| b5-adrb2-Hex | Hex <i>CCgg</i> <i>Sp18</i> ACC CAA TAG AAG CCA <i>CCgg</i> BHQ1              | 8665.0    | 8663.3     |
| b6-adrb2-Fam | Fam <i>CCgg</i> ACC CAA TGG AAG CC <i>Sp18</i> <i>CCgg</i> BHQ1               | 8144.9    | 8145.4     |
| b6-adrb2-Hex | Hex <i>CCgg</i> ACC CAA TAG AAG CCA <i>Sp18</i> <i>CCgg</i> BHQ1              | 8665.0    | 8663.3     |
| b0-nos3-Fam  | Fam <i>CCgg</i> CAG ATG AGC CCC C <i>CCgg</i> BHQ1                            | 7776.7    | 7781.2     |
| b0-nos3-Hex  | Hex <i>CCgg</i> CAG ATG ATC CCC CA <i>CCgg</i> BHQ1                           | 7974.7    | 7976.9     |
| b0-nos3-R6G  | R6G <i>CCgg</i> CAG ATG ATC CCC CA <i>CCgg</i> BHQ1                           | 7833.9    | 7837.0     |
| b1-nos3-Fam  | Fam <i>CCgg</i> dIdIdI CAG ATG AGC CCC C dIdIdI <i>CCgg</i> BHQ1              | 9661.1    | 9665.4     |
| b1-nos3-Hex  | Hex <i>CCgg</i> dIdIdI CAG ATG ATC CCC CA dIdIdI <i>CCgg</i> BHQ1             | 9859.1    | 9861.0     |
| b2-nos3-Fam  | Fam <i>CCgg</i> dIdIdI CAG ATG AGC CCC C <i>CCgg</i> BHQ1                     | 8718.6    | 8723.4     |
| b2-nos3-Hex  | Hex <i>CCgg</i> dIdIdI CAG ATG ATC CCC CA <i>CCgg</i> BHQ1                    | 8916.9    | 8918.9     |
| b3-nos3-Fam  | Fam <i>CCgg</i> CAG ATG AGC CCC C dIdIdI <i>CCgg</i> BHQ1                     | 8718.9    | 8723.3     |
| b3-nos3-Hex  | Hex <i>CCgg</i> CAG ATG ATC CCC CA dIdIdI <i>CCgg</i> BHQ1                    | 8916.9    | 8918.9     |
| b4-nos3-Fam  | Fam <i>CCgg</i> <i>Sp18</i> CAG ATG AGC CCC C <i>Sp18</i> <i>CCgg</i> BHQ1    | 8465.0    | 8461.6     |
| b4-nos3-Hex  | Hex <i>CCgg</i> <i>Sp18</i> CAG ATG ATC CCC CA <i>Sp18</i> <i>CCgg</i> BHQ1   | 8662.6    | 8657.2     |
| b5-nos3-Fam  | Fam <i>CCgg</i> <i>Sp18</i> CAG ATG AGC CCC C <i>CCgg</i> BHQ1                | 8120.9    | 8121.4     |
| b5-nos3-Hex  | Hex <i>CCgg</i> <i>Sp18</i> CAG ATG ATC CCC CA <i>CCgg</i> BHQ1               | 8318.5    | 8317.0     |
| b6-nos3-Fam  | Fam <i>CCgg</i> CAG ATG AGC CCC C <i>Sp18</i> <i>CCgg</i> BHQ1                | 8120.9    | 8121.4     |
| b6-nos3-Hex  | Hex <i>CCgg</i> CAG ATG ATC CCC CA <i>Sp18</i> <i>CCgg</i> BHQ1               | 8318.9    | 8317.0     |
| b0-FV-Fam    | Fam <i>CCgg</i> GA CAG GCG AGG AAT <i>CCgg</i> BHQ1                           | 7920.8    | 7925.3     |
| b0-FV-Hex    | Hex <i>CCgg</i> GA CAG GCA AGG AAT A <i>CCgg</i> BHQ1                         | 8440.9    | 8443.0     |
| b0-FV-R6G    | R6G <i>CCgg</i> GA CAG GCA AGG AAT A <i>CCgg</i> BHQ1                         | 8299.7    | 8303.1     |
| b1-FV-Fam    | Fam <i>CCgg</i> dIdIdI GA CAG GCG AGG AAT dIdIdI <i>CCgg</i> BHQ1             | 9804.8    | 9809.5     |
| b1-FV-Hex    | Hex <i>CCgg</i> dIdIdI GA CAG GCA AGG AAT A dIdIdI <i>CCgg</i> BHQ1           | 10324.7   | 10327.1    |
| b2-FV-Fam    | Fam <i>CCgg</i> dIdIdI GA CAG GCG AGG AAT <i>CCgg</i> BHQ1                    | 8862.9    | 8867.4     |
| b2-FV-Hex    | Hex <i>CCgg</i> dIdIdI GA CAG GCA AGG AAT A <i>CCgg</i> BHQ1                  | 9382.6    | 9385.3     |
| b3-FV-Fam    | Fam <i>CCgg</i> GA CAG GCG AGG AAT dIdIdI <i>CCgg</i> BHQ1                    | 8862.9    | 8867.4     |
| b3-FV-Hex    | Hex <i>CCgg</i> GA CAG GCA AGG AAT A dIdIdI <i>CCgg</i> BHQ1                  | 9382.6    | 9385.3     |
| b4-FV-Fam    | Fam <i>CCgg</i> <i>Sp18</i> GA CAG GCG AGG AAT <i>Sp18</i> <i>CCgg</i> BHQ1   | 8609.0    | 8605.6     |
| b4-FV-Hex    | Hex <i>CCgg</i> <i>Sp18</i> GA CAG GCA AGG AAT A <i>Sp18</i> <i>CCgg</i> BHQ1 | 9128.7    | 9123.5     |
| b5-FV-Fam    | Fam <i>CCgg</i> <i>Sp18</i> GA CAG GCG AGG AAT <i>CCgg</i> BHQ1               | 8264.9    | 8265.5     |
| b5-FV-Hex    | Hex <i>CCgg</i> <i>Sp18</i> GA CAG GCA AGG AAT A <i>CCgg</i> BHQ1             | 8784.9    | 8783.3     |
| b6-FV-Fam    | Fam <i>CCgg</i> GA CAG GCG AGG AAT <i>Sp18</i> <i>CCgg</i> BHQ1               | 8264.9    | 8265.5     |
| b6-FV-Hex    | Hex <i>CCgg</i> GA CAG GCA AGG AAT A <i>Sp18</i> <i>CCgg</i> BHQ1             | 8784.6    | 8783.1     |

### Oligonucleotide Bg0-ADRB2-Fam - HPLC traces and MS data

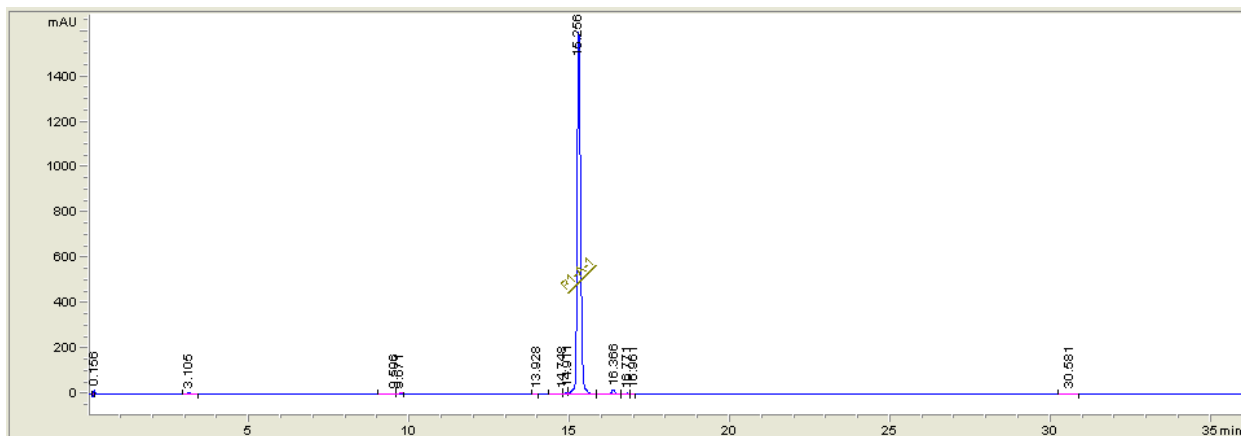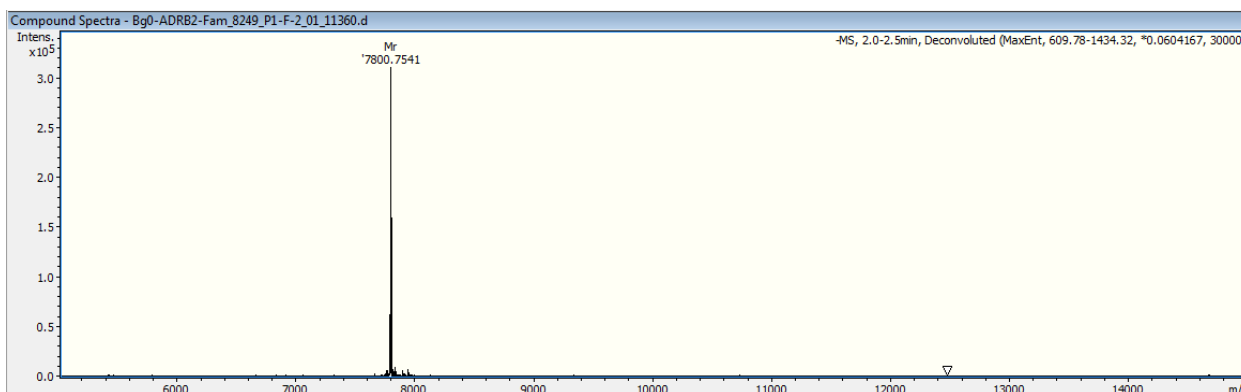

### Oligonucleotide Ba0-ADRB2-Hex - HPLC traces and MS data

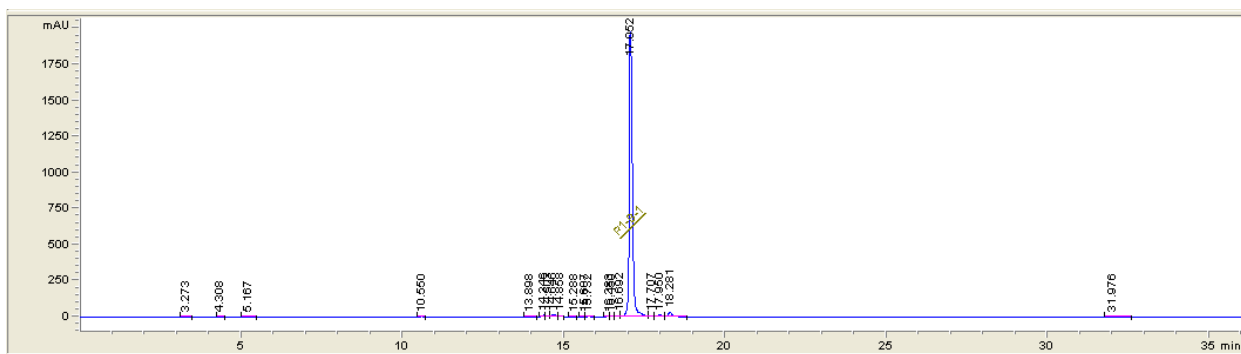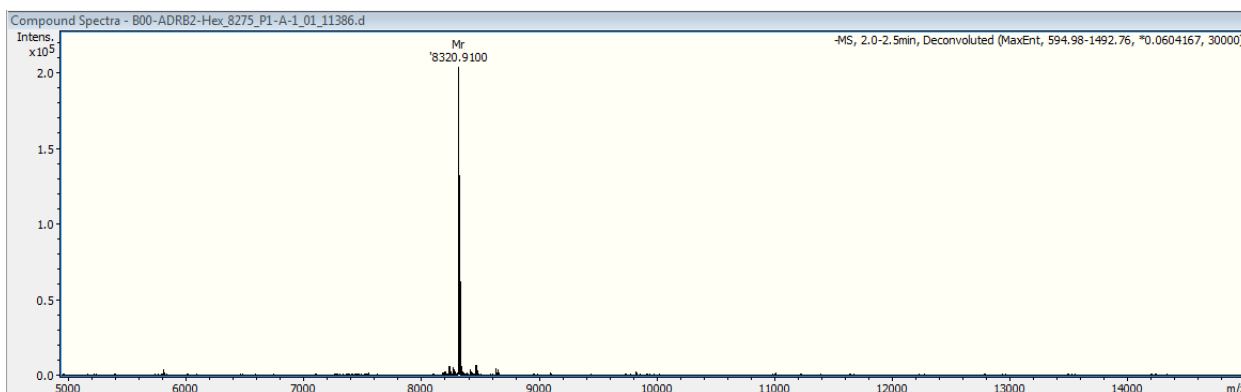

## Oligonucleotide Ba0-ADRB2-R6G - HPLC traces and MS data

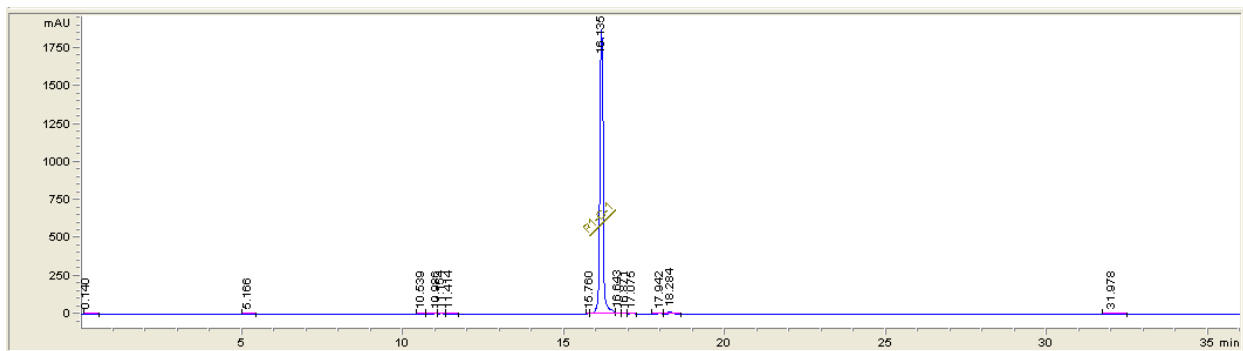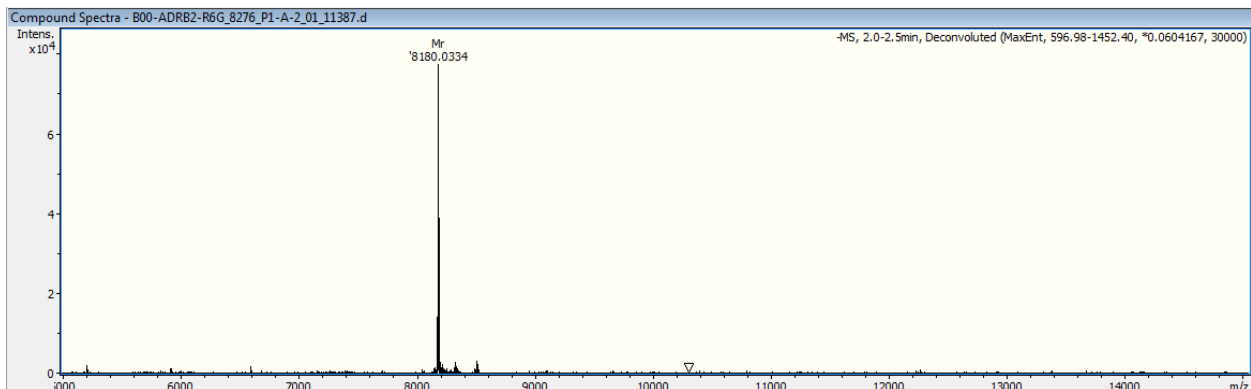

## Oligonucleotide Bg1-ADRB2-Fam - HPLC traces and MS data

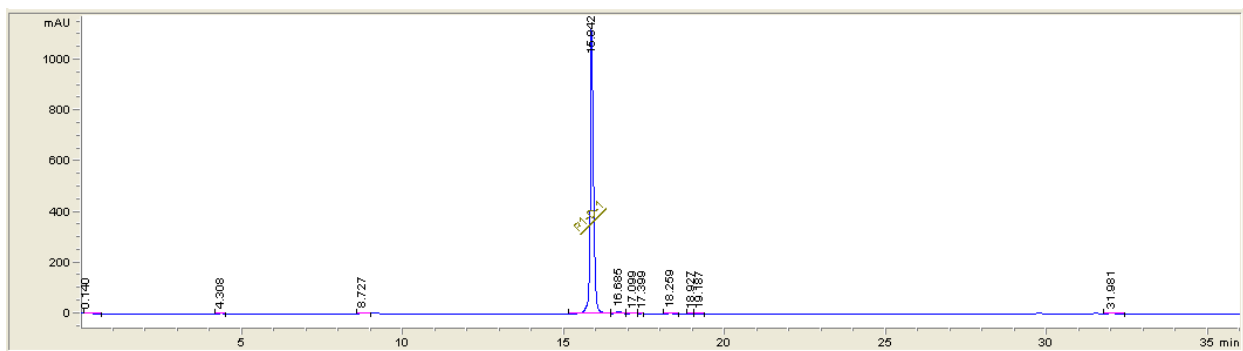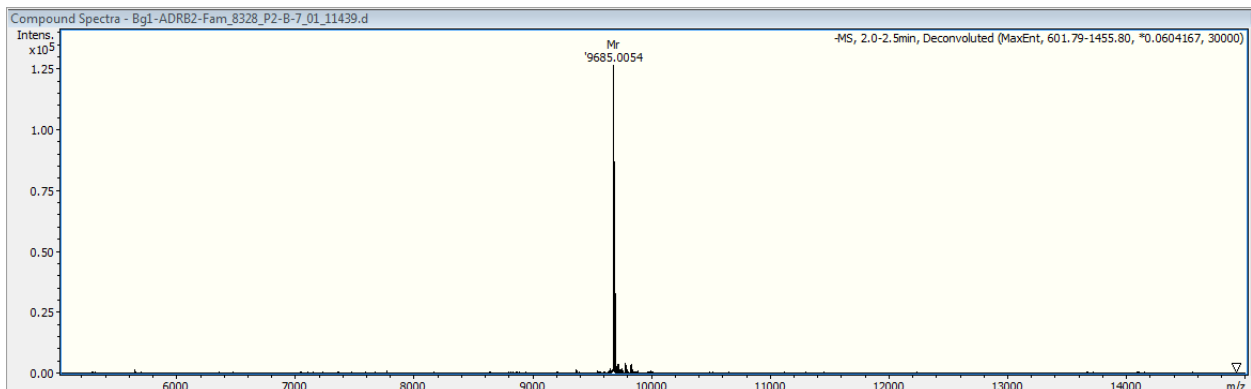

### Oligonucleotide Ba1-ADRB2-Hex - HPLC traces and MS data

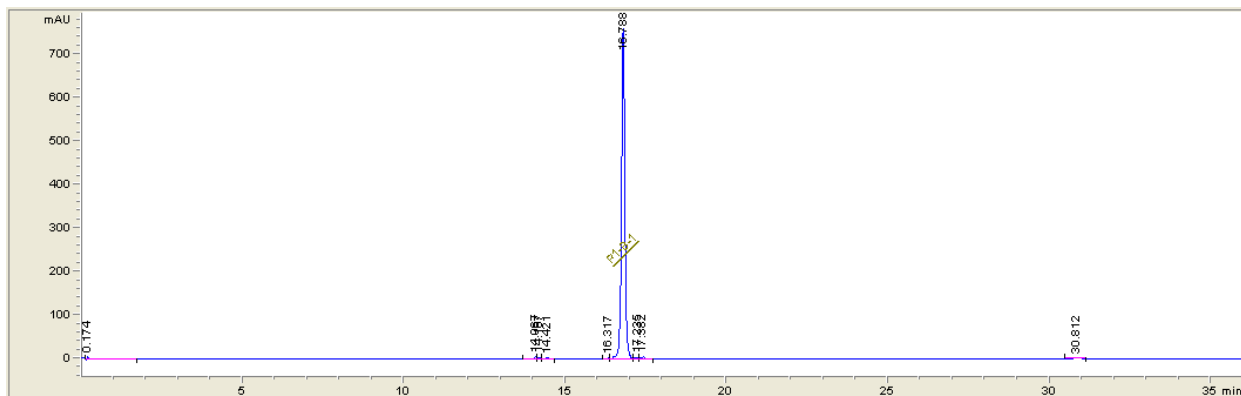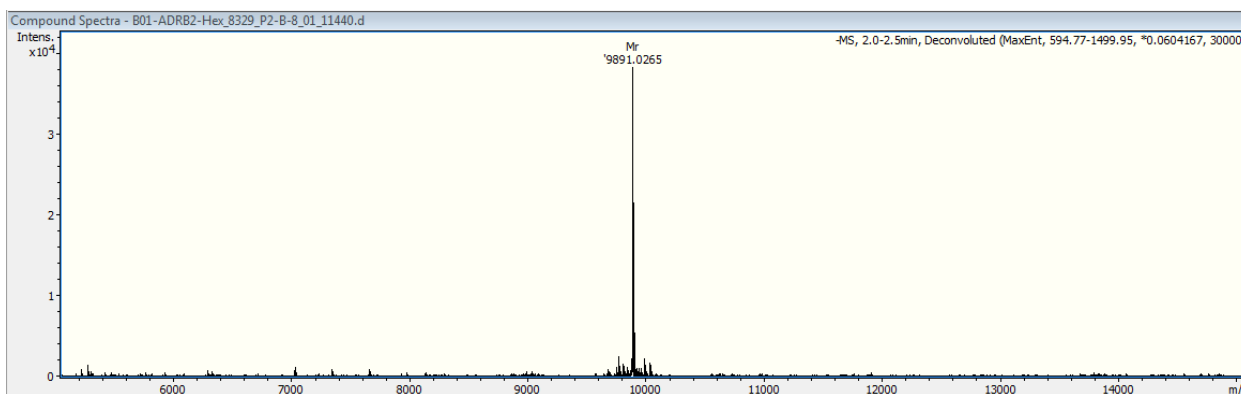

### Oligonucleotide Bg2-ADRB2-Fam - HPLC traces and MS data

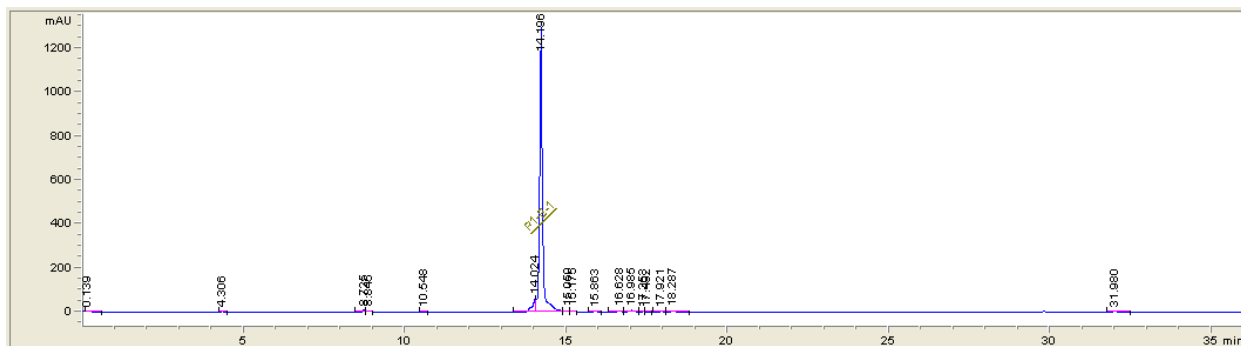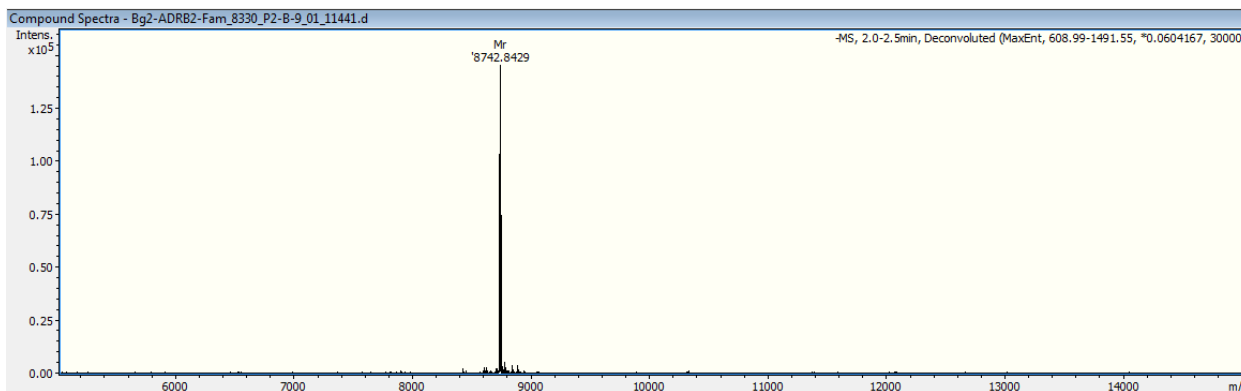

### Oligonucleotide Ba2-ADRB2-Hex - HPLC traces and MS data

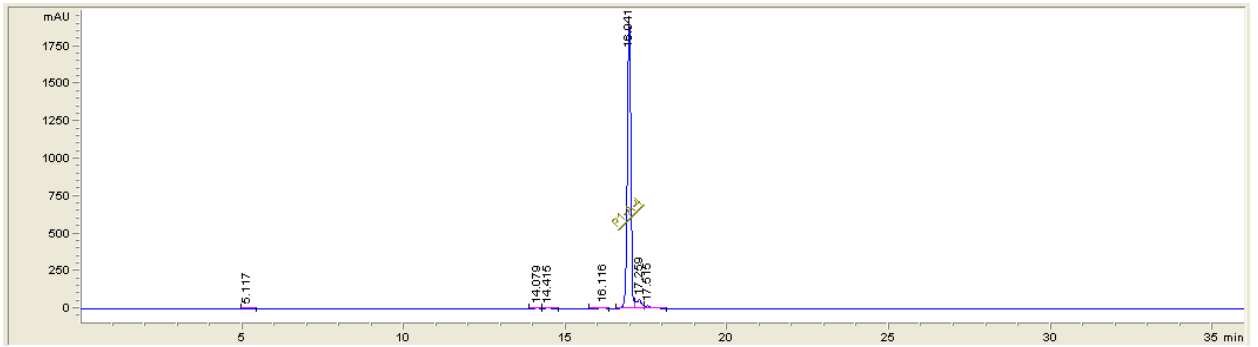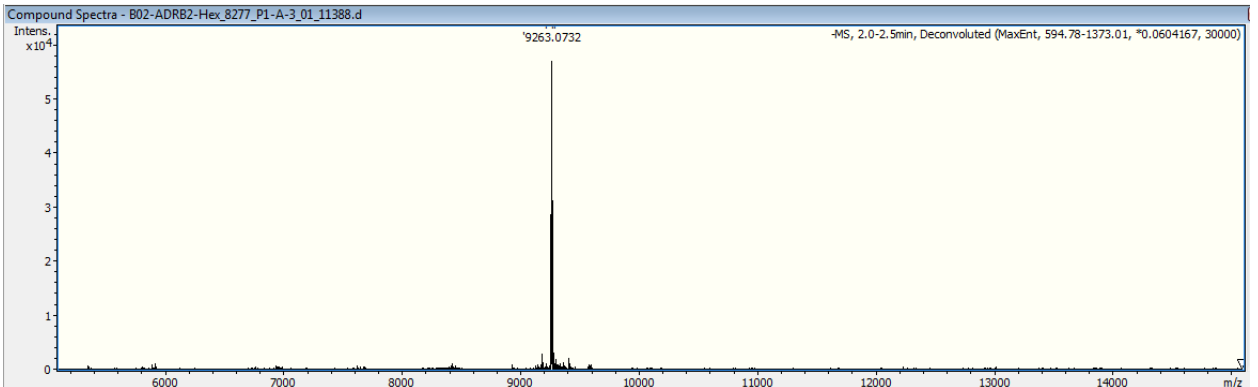

### Oligonucleotide Bg3-ADRB2-Fam - HPLC traces and MS data

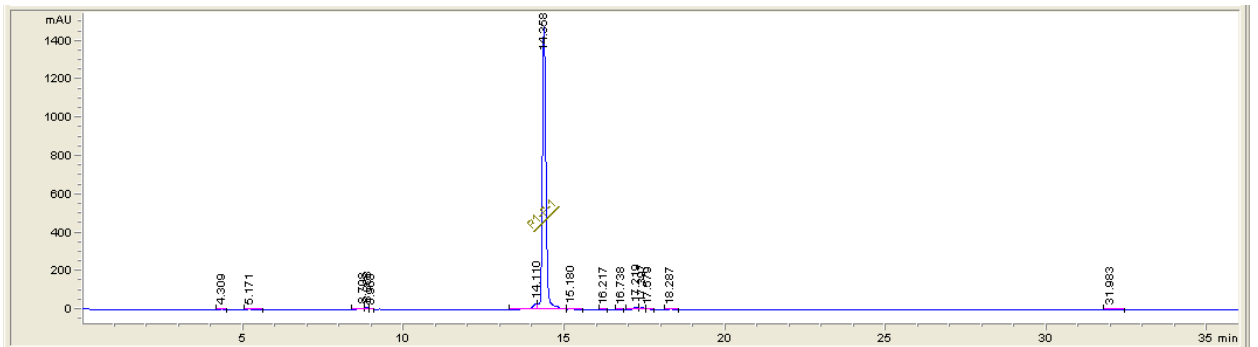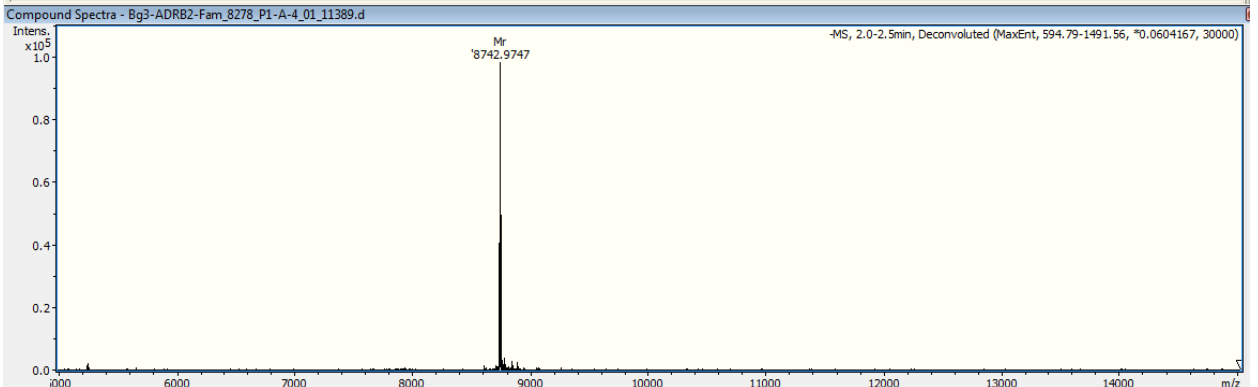

## Oligonucleotide Ba3-ADRB2-Hex - HPLC traces and MS data

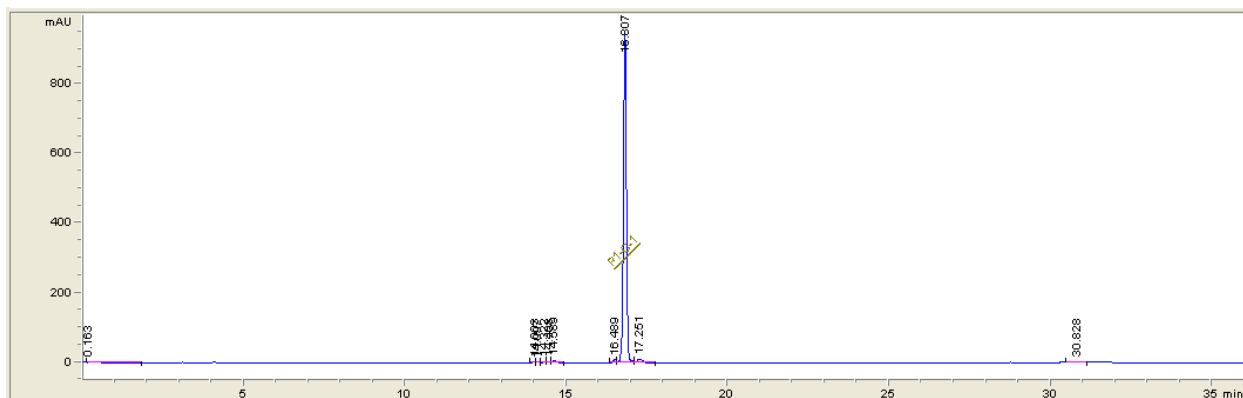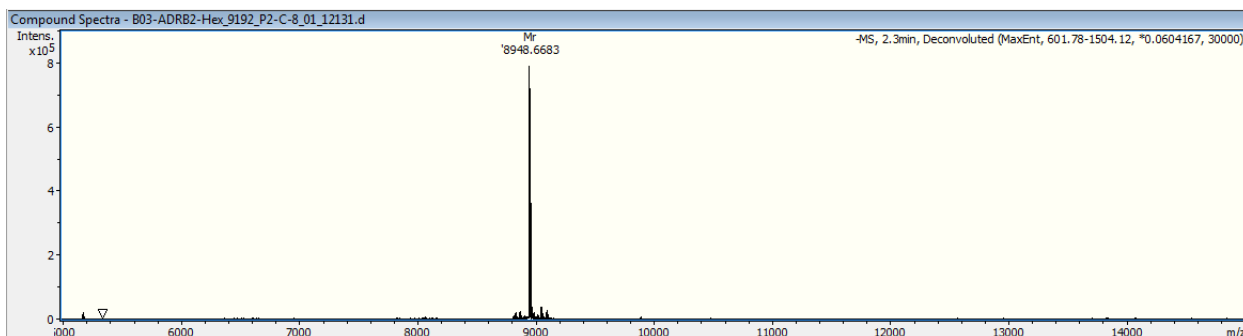

## Oligonucleotide Bg4-ADRB2-Fam - HPLC traces and MS data

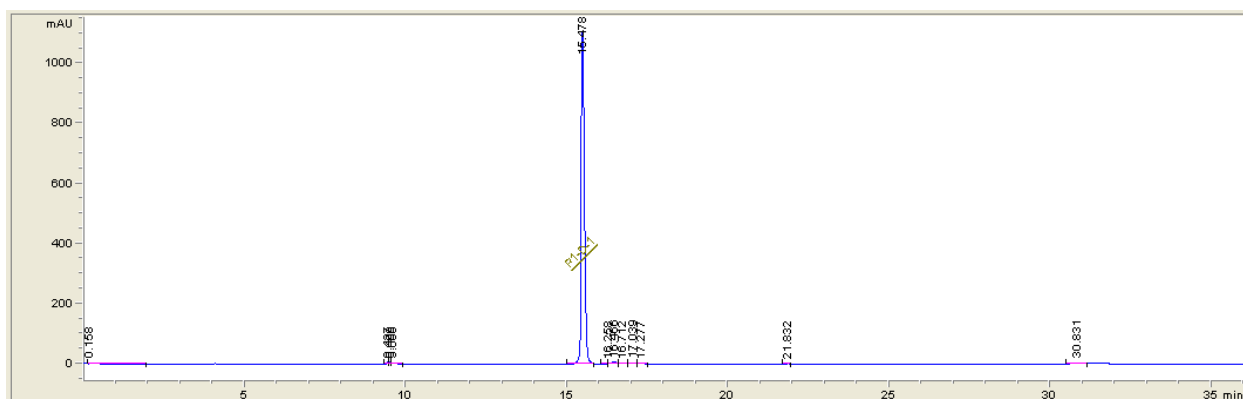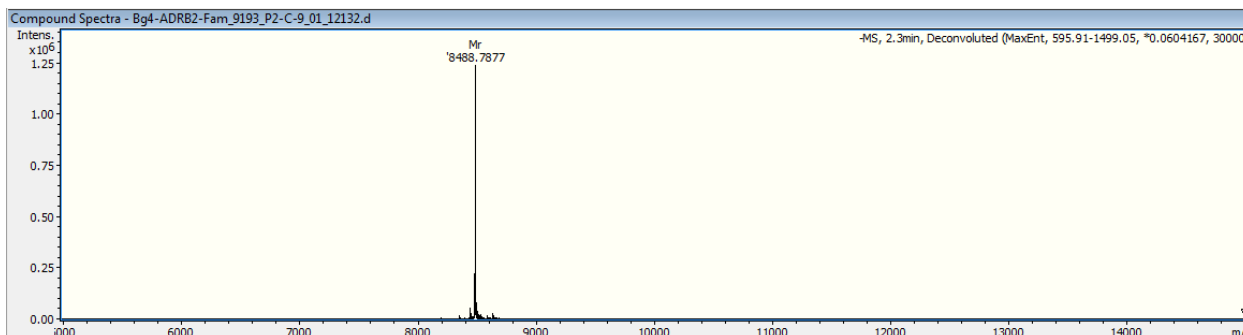

## Oligonucleotide Ba4-ADRB2-Hex - HPLC traces and MS data

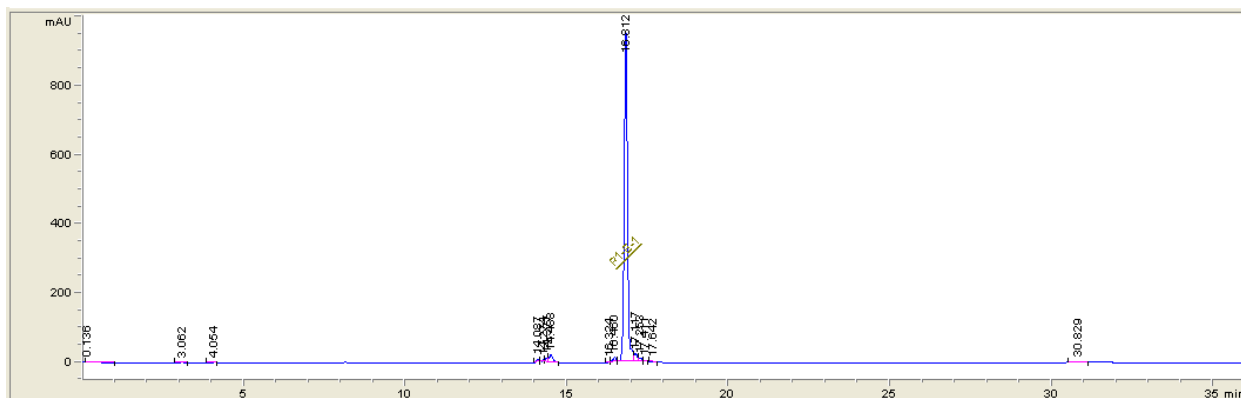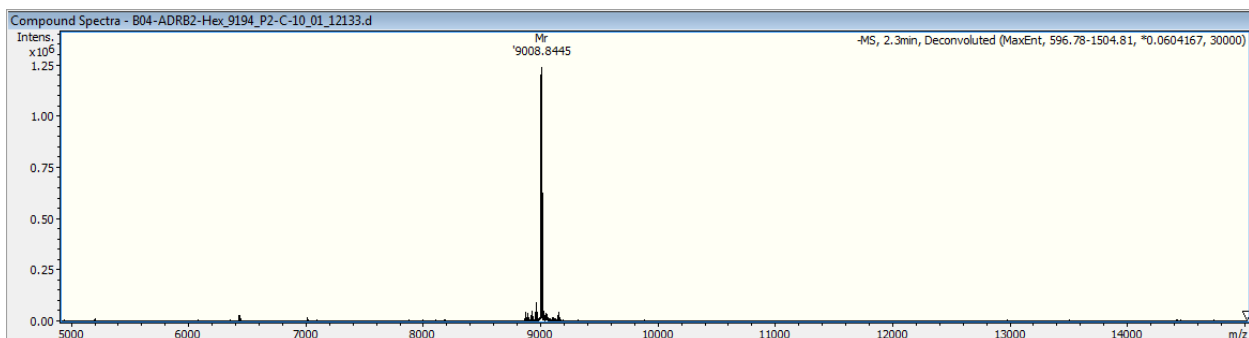

## Oligonucleotide Bg5-ADRB2-Fam - HPLC traces and MS data

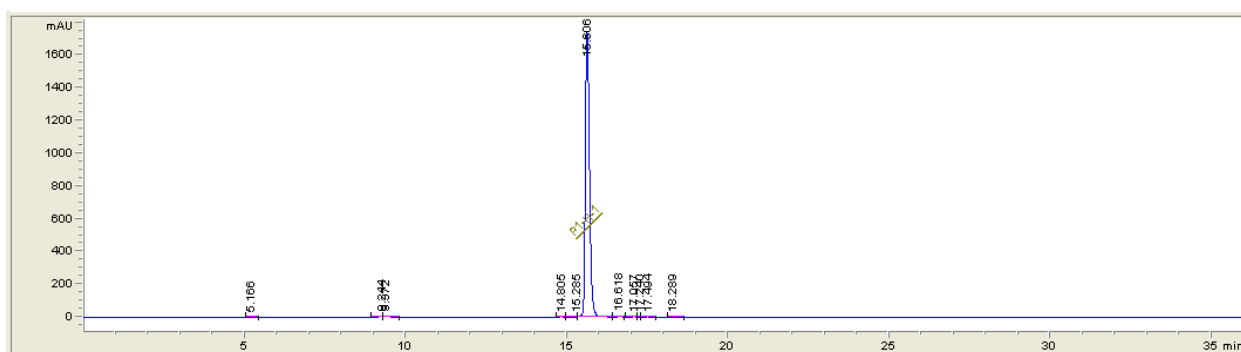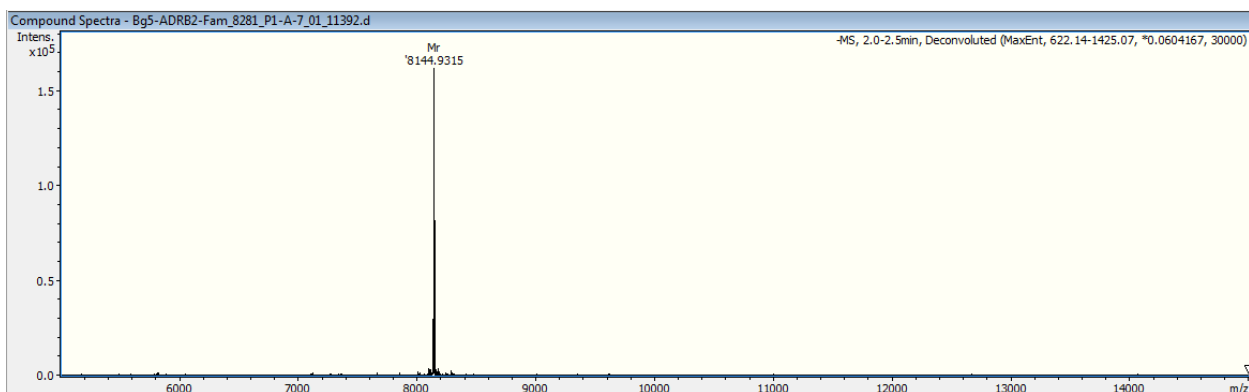



### Oligonucleotide Ba5-ADRB2-Hex - HPLC traces and MS data

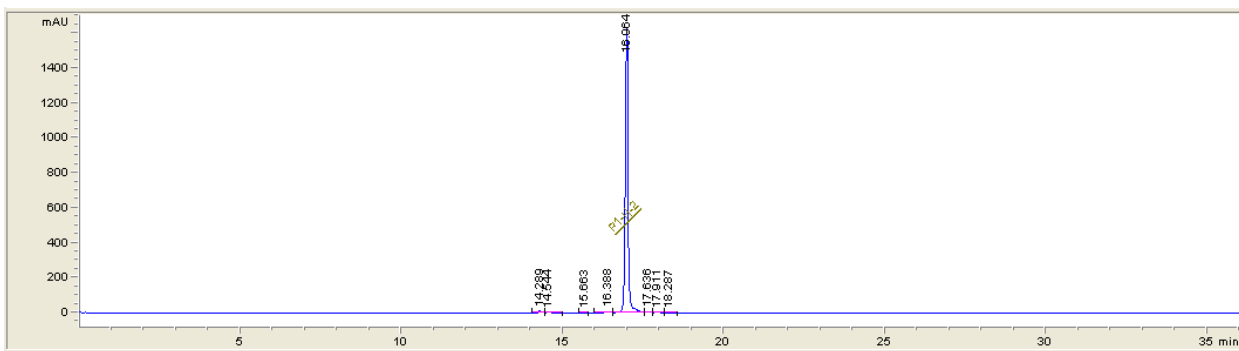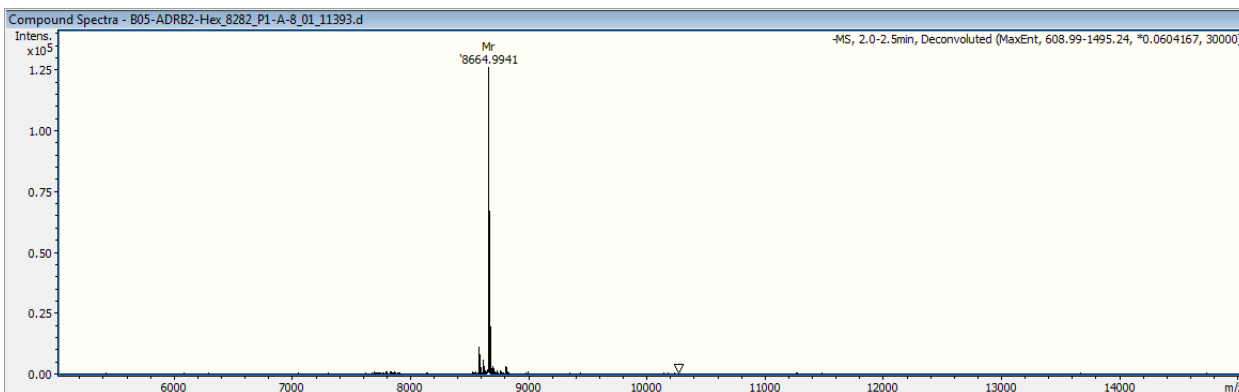

### Oligonucleotide Bg6-ADRB2-Fam - HPLC traces and MS data

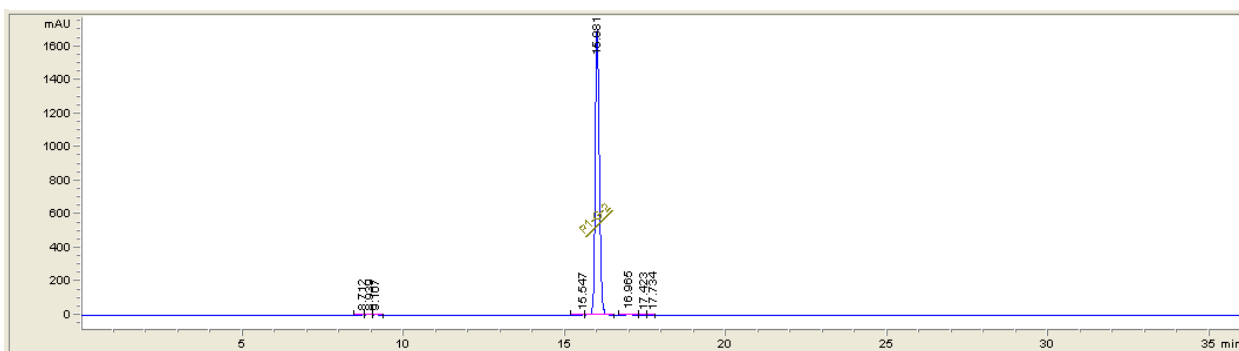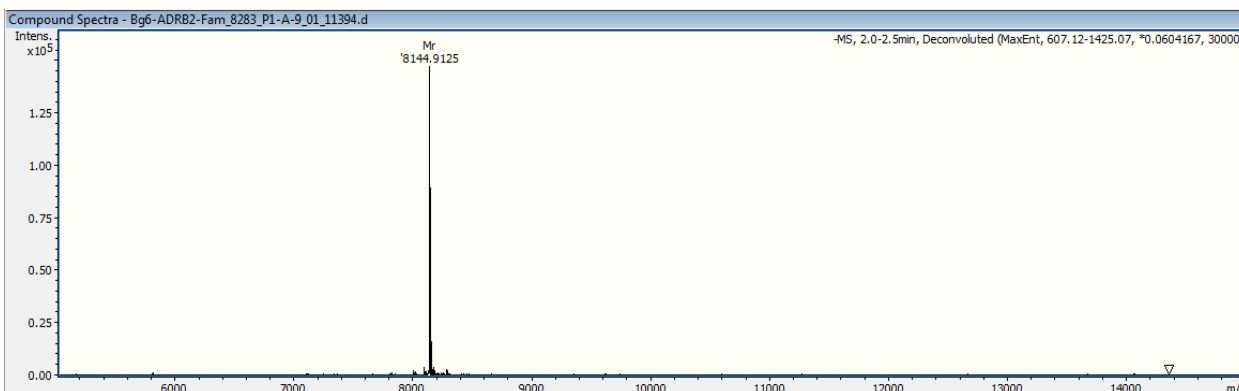

## Oligonucleotide Ba6-ADRB2-Hex - HPLC traces and MS data

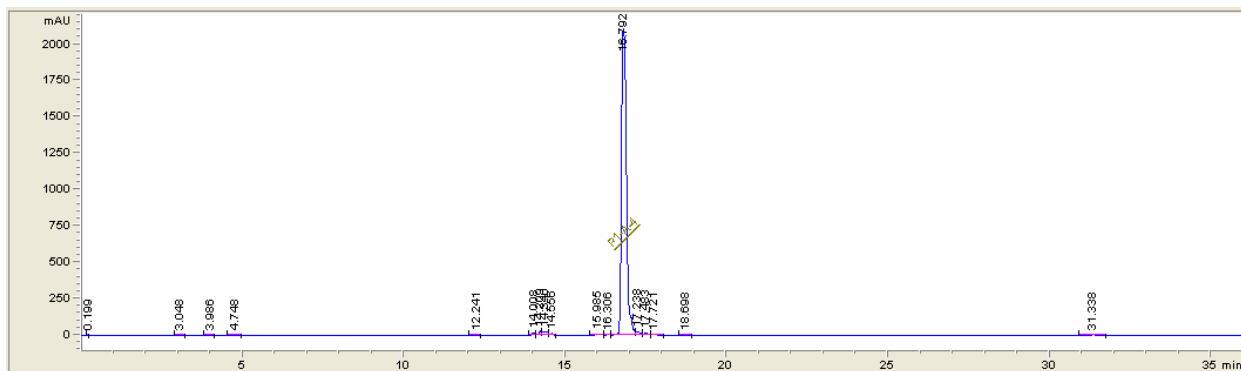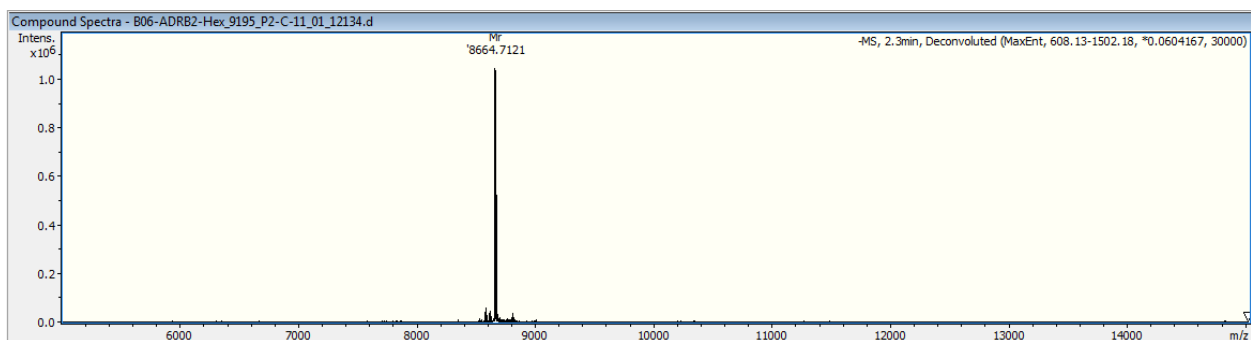

## Oligonucleotide Bg0-NOS3-Fam - HPLC traces and MS data

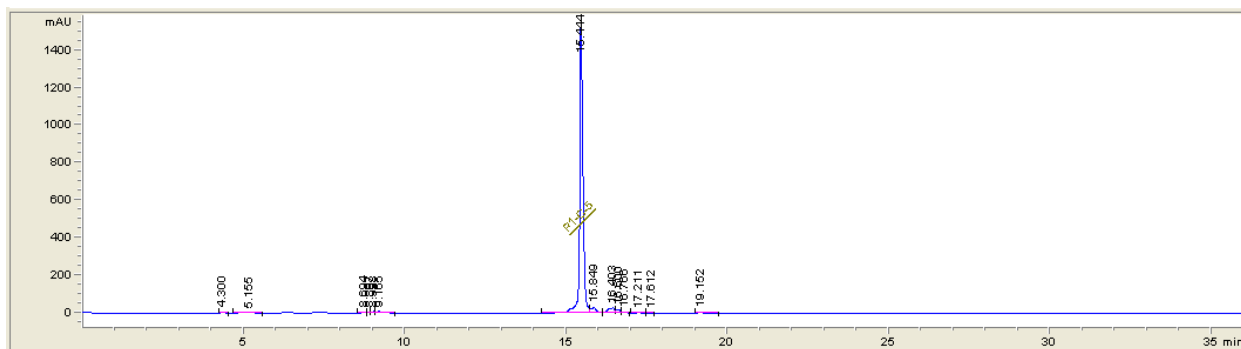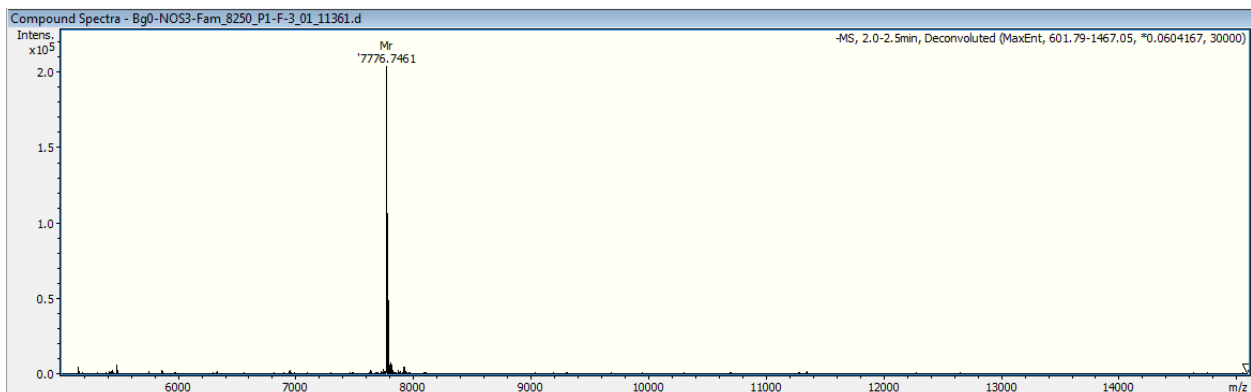

## Oligonucleotide Bt0-NOS3-Hex - HPLC traces and MS data

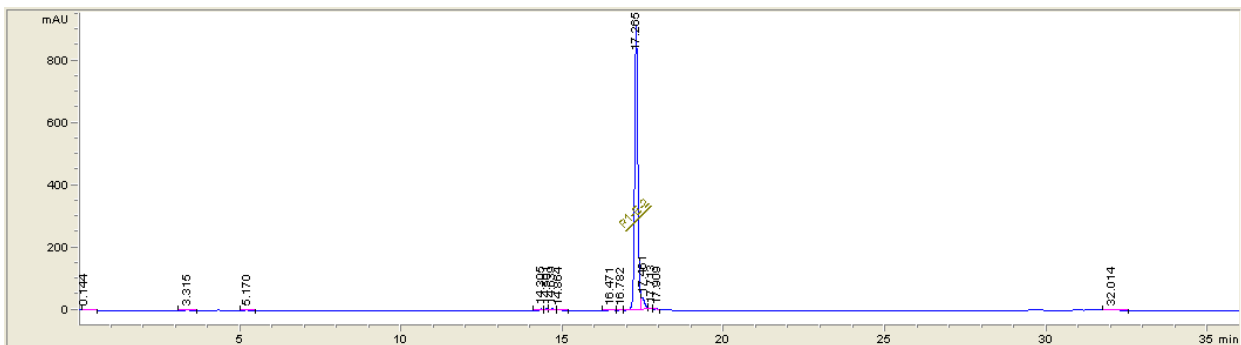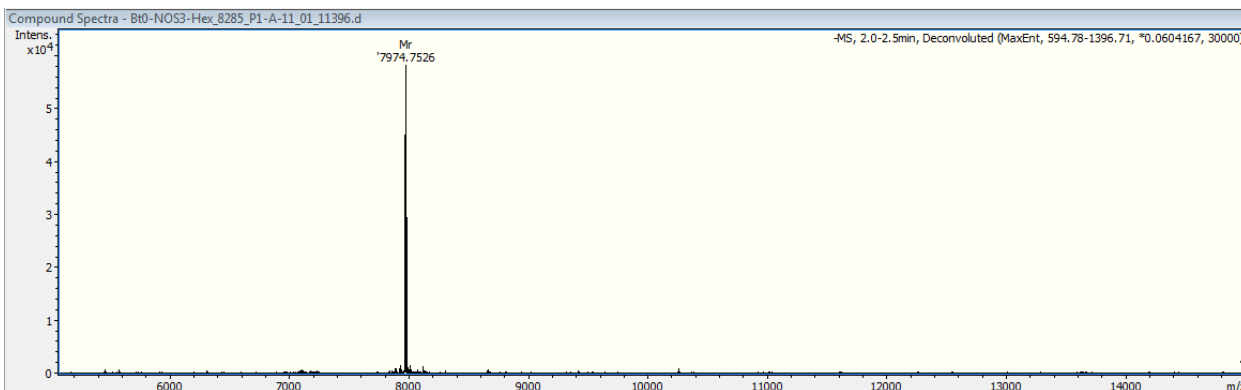

## Oligonucleotide Bt0-NOS3-R6G - HPLC traces and MS data

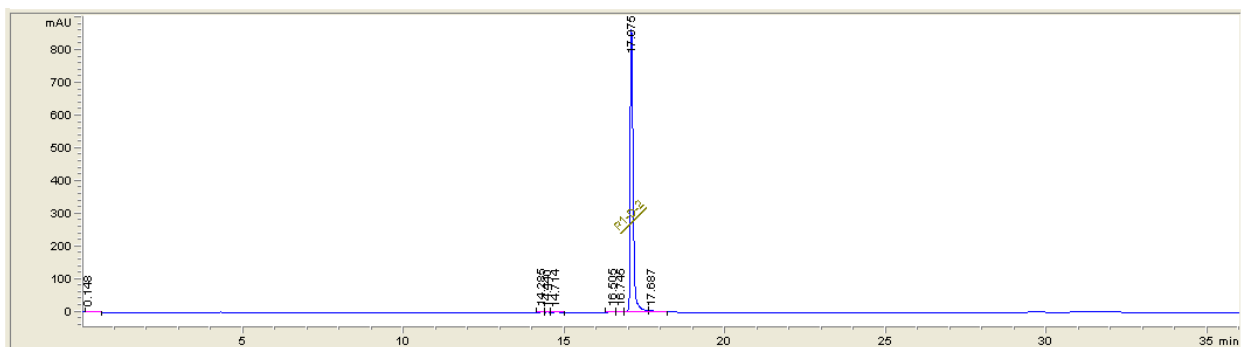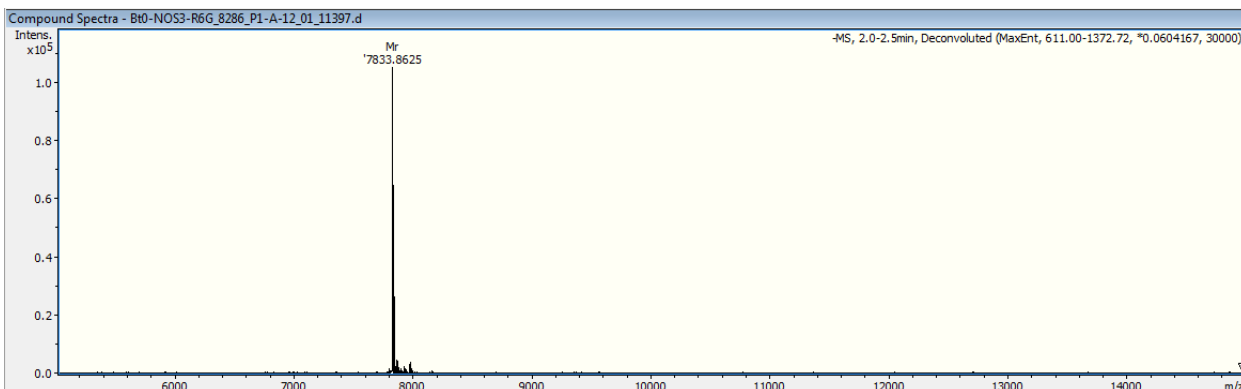

## Oligonucleotide Bg1-NOS3-Fam - HPLC traces and MS data

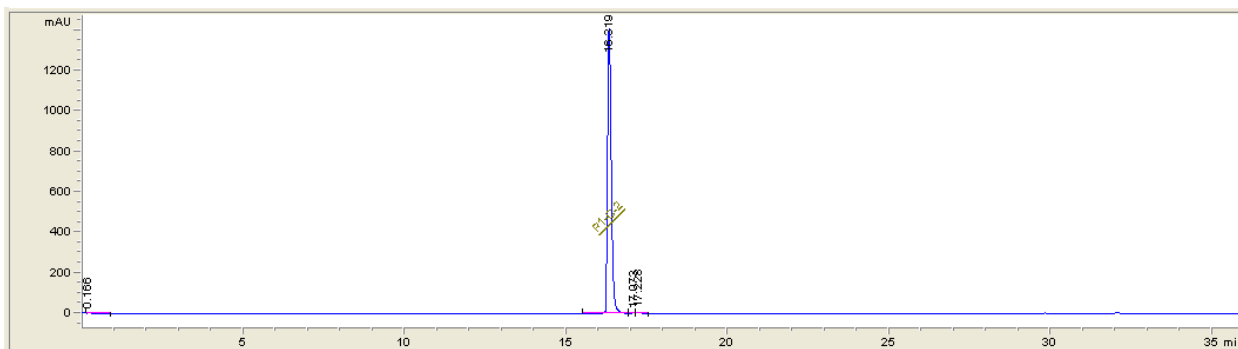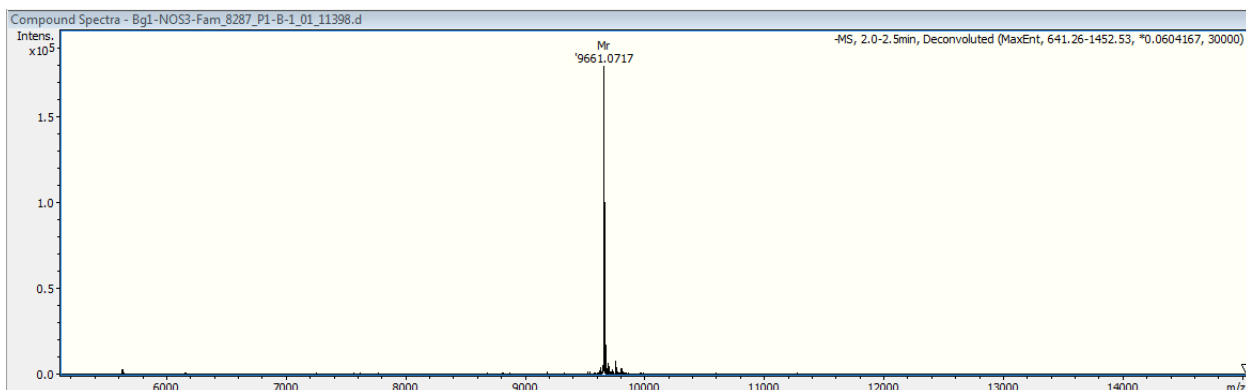

## Oligonucleotide Bt1-NOS3-Hex - HPLC traces and MS data

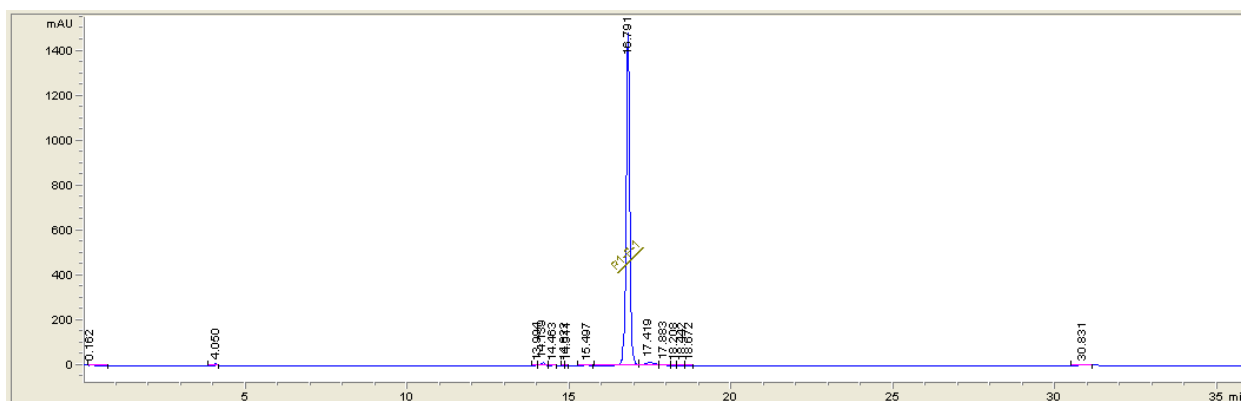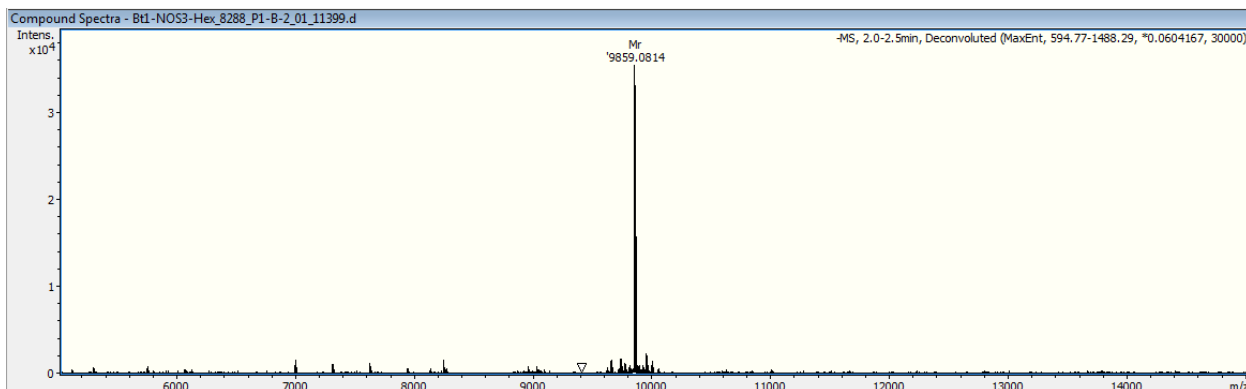

## Oligonucleotide Bg2-NOS3-Fam - HPLC traces and MS data

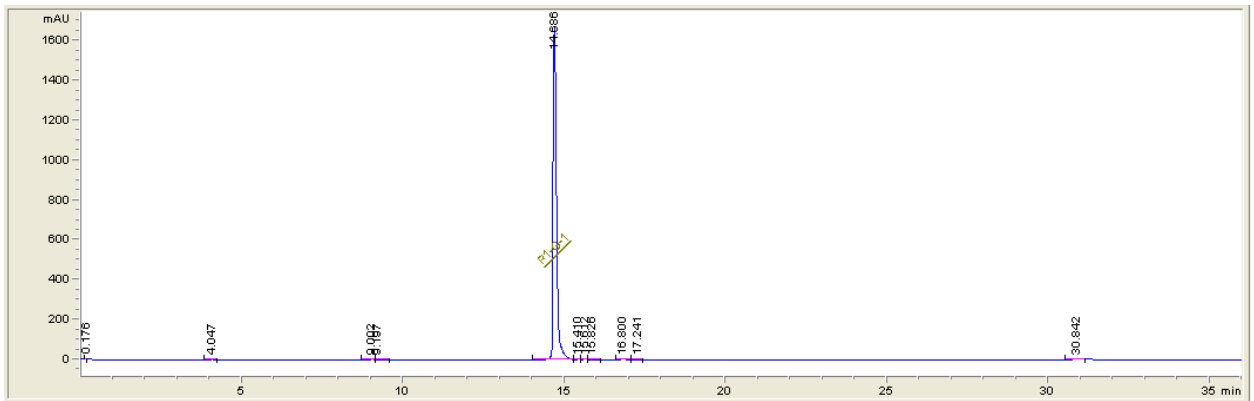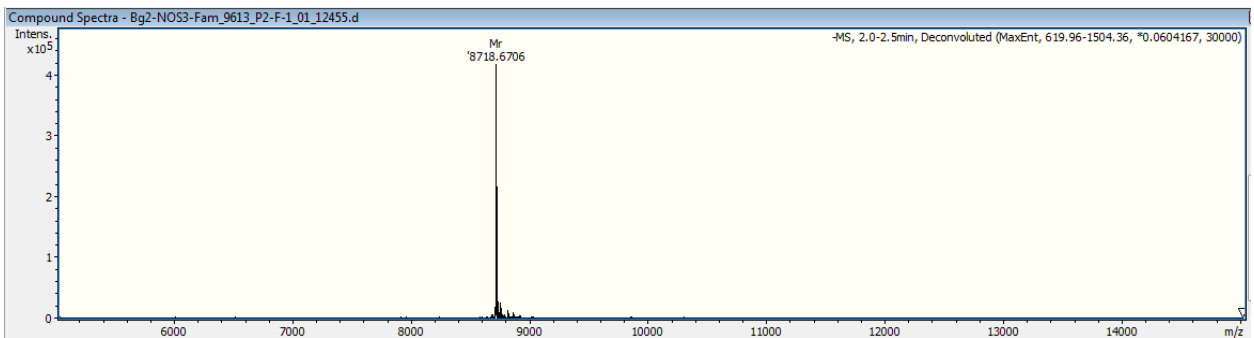

## Oligonucleotide Bt2-NOS3-Hex - HPLC traces and MS data

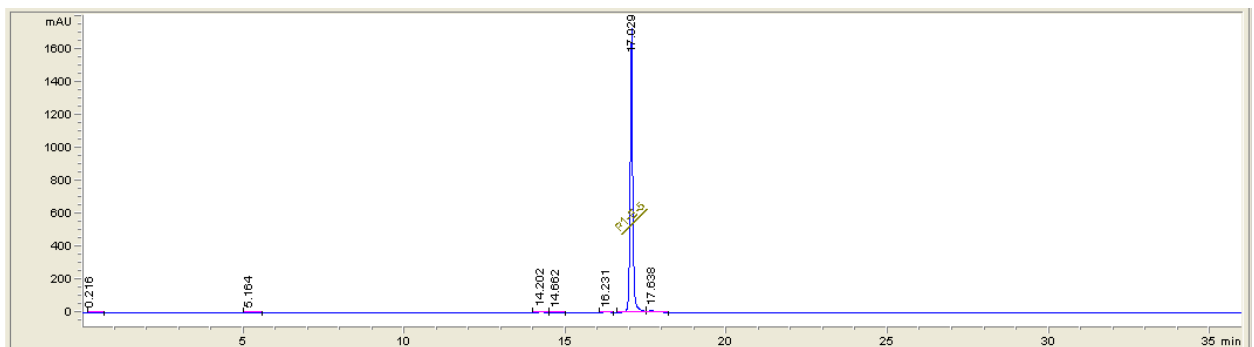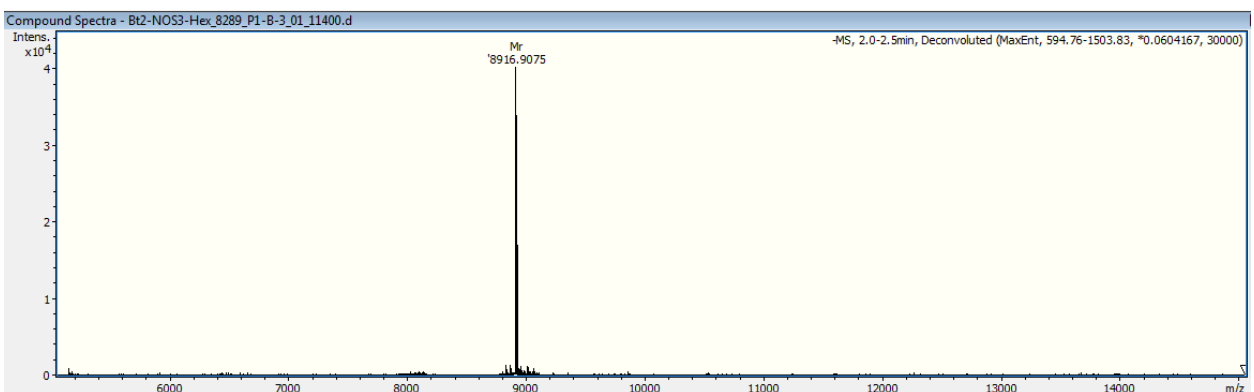

## Oligonucleotide Bg3-NOS3-Fam - HPLC traces and MS data

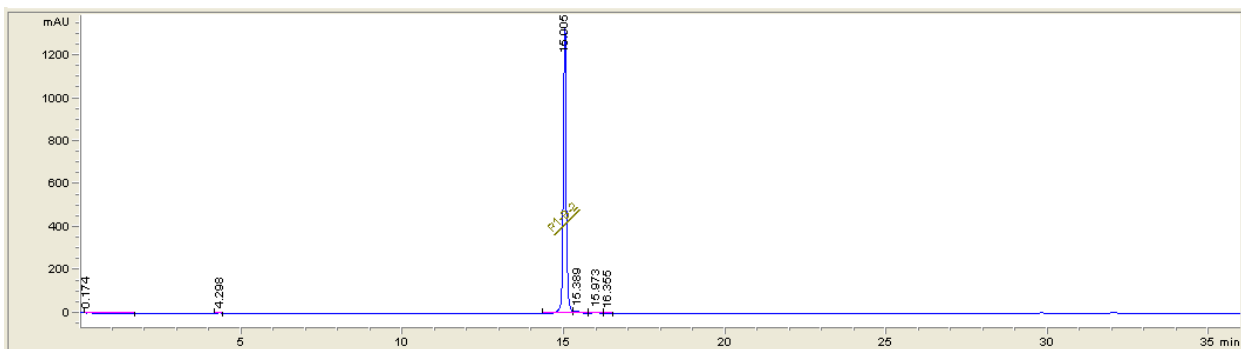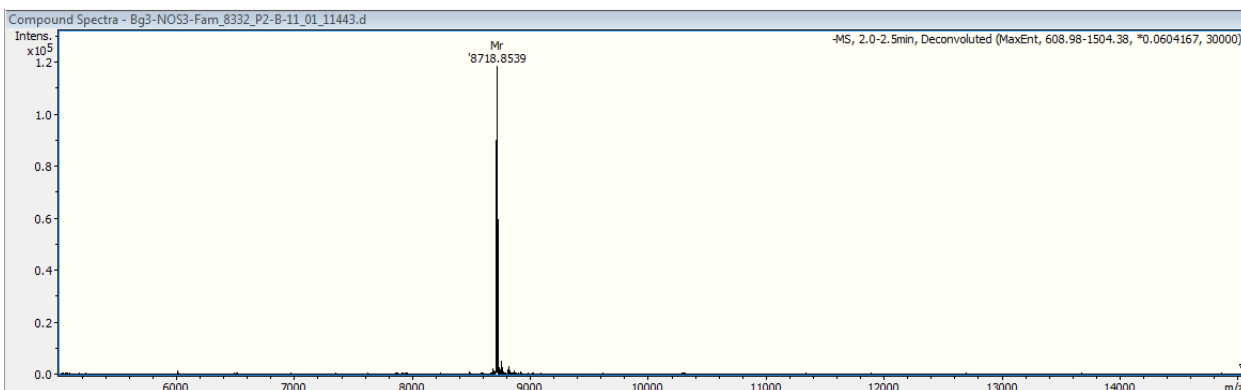

## Oligonucleotide Bt3-NOS3-Hex - HPLC traces and MS data

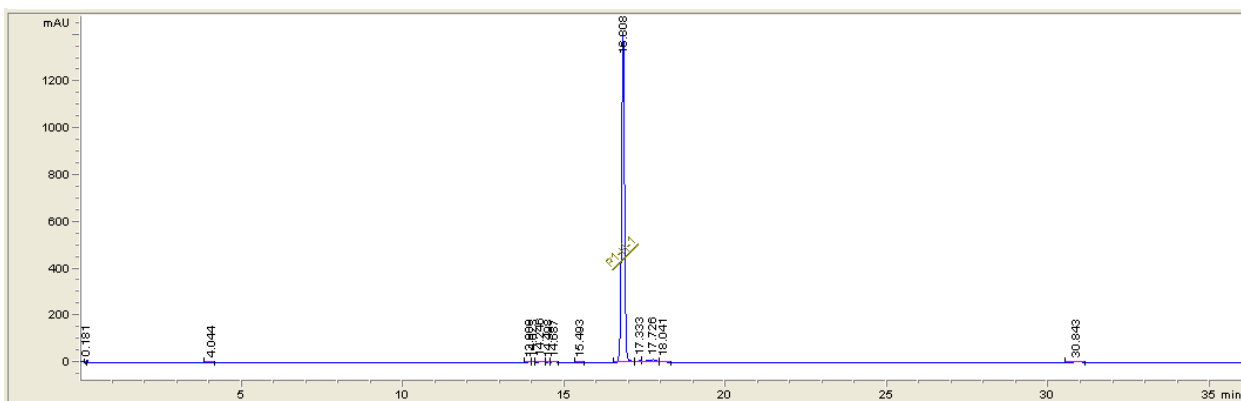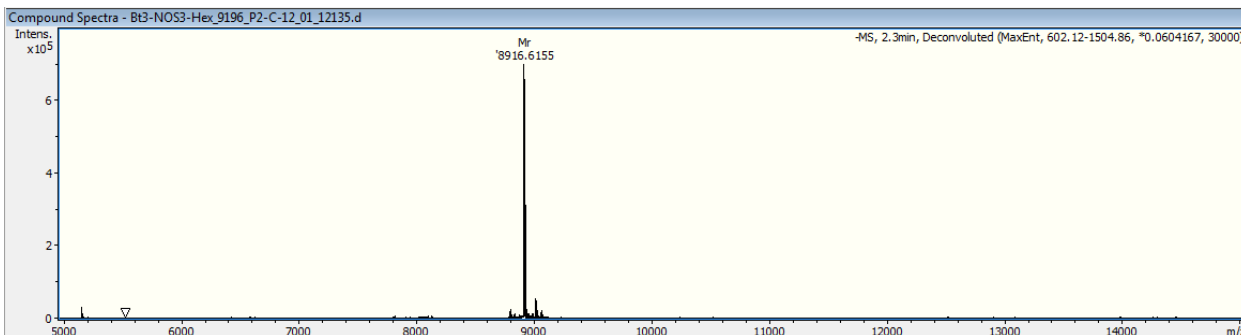

## Oligonucleotide Bg4-NOS3-Fam - HPLC traces and MS data

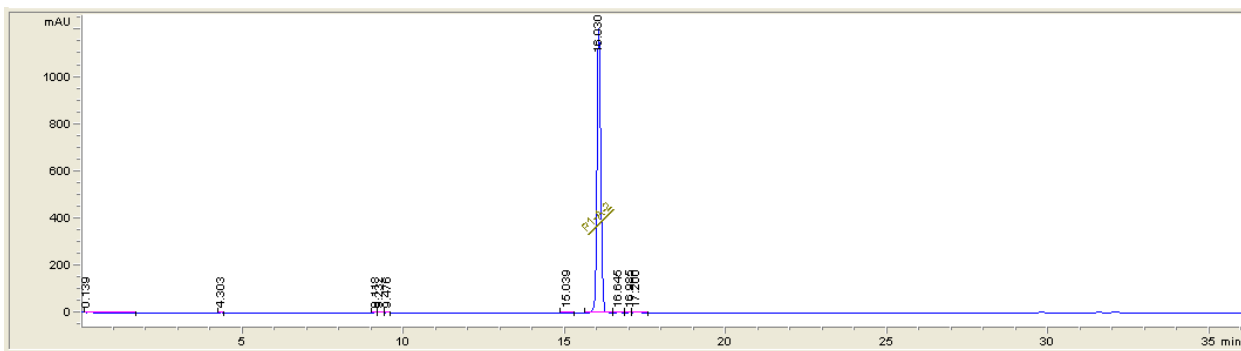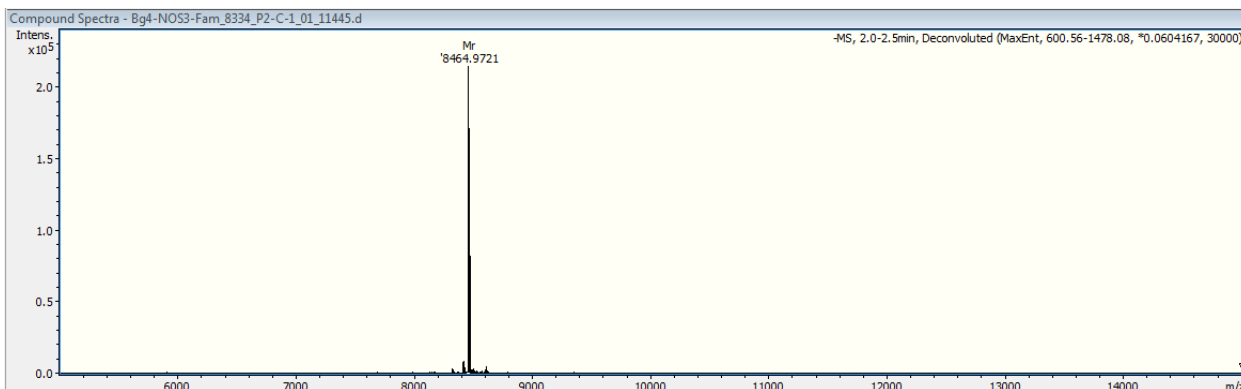

## Oligonucleotide Bt4-NOS3-Hex - HPLC traces and MS data

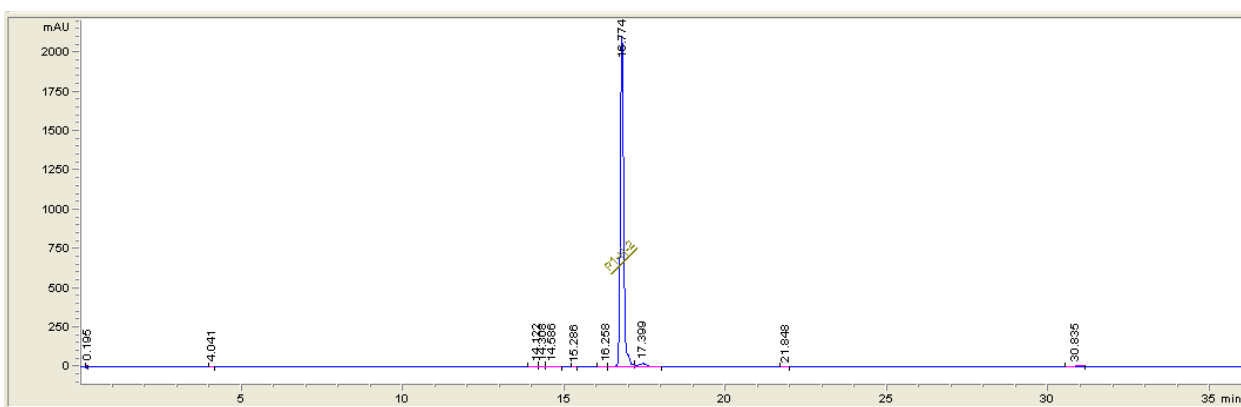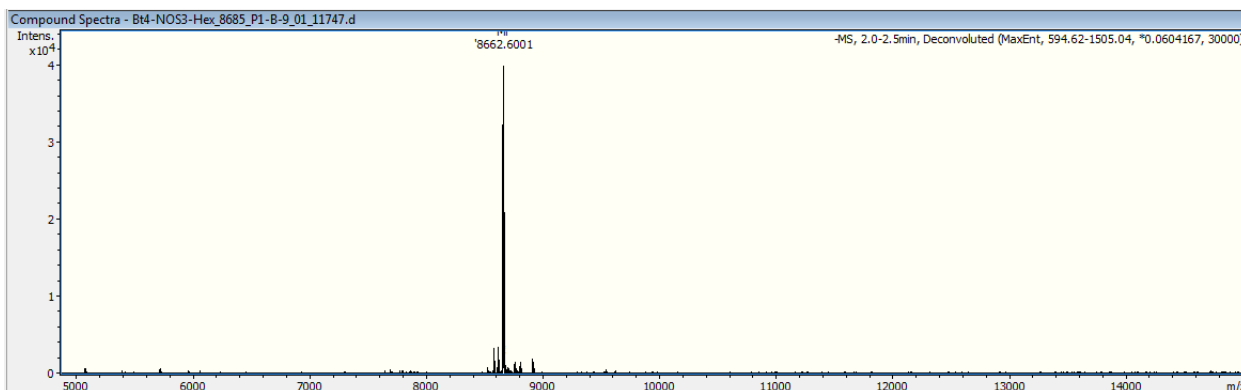

## Oligonucleotide Bg5-NOS3-Fam - HPLC traces and MS data

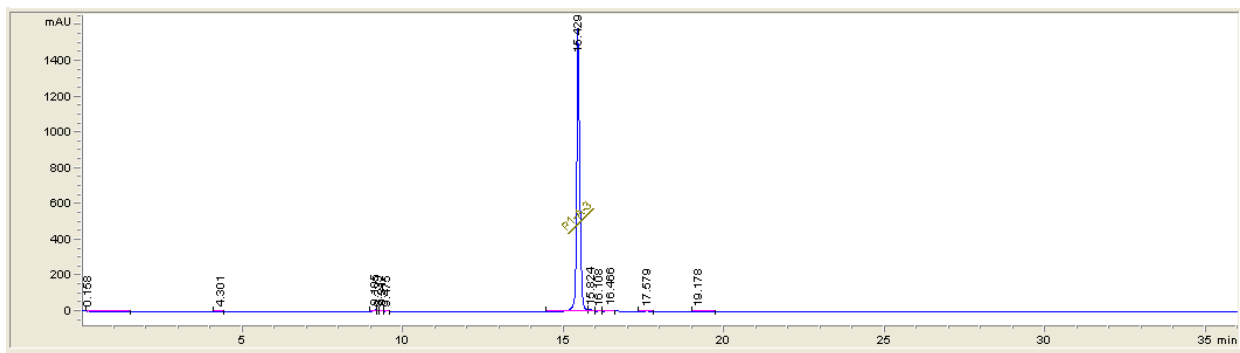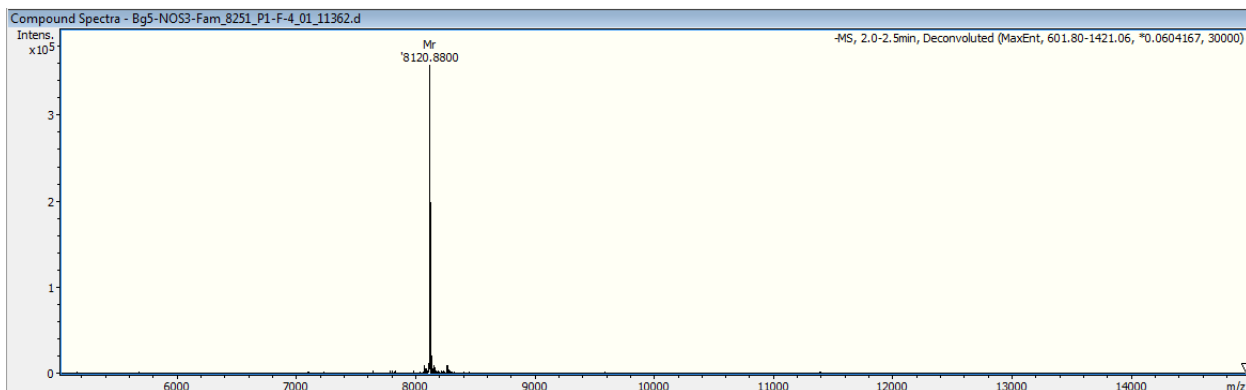

## Oligonucleotide Bt5-NOS3-Hex - HPLC traces and MS data

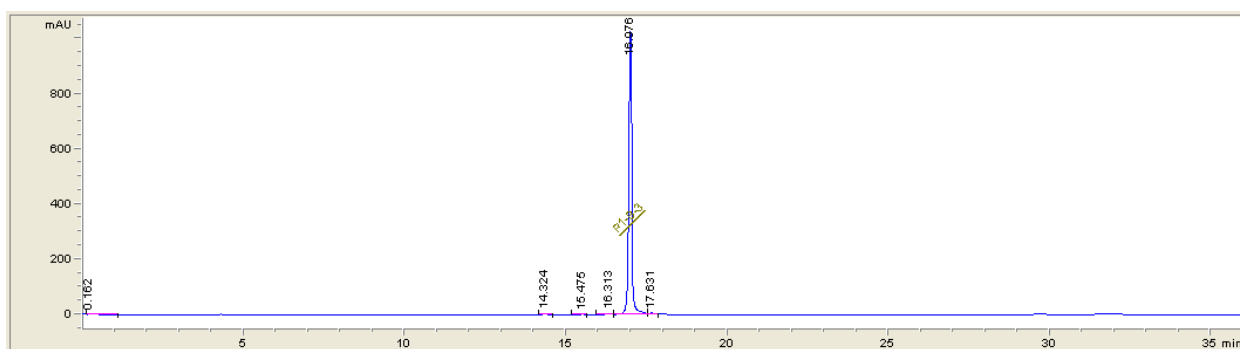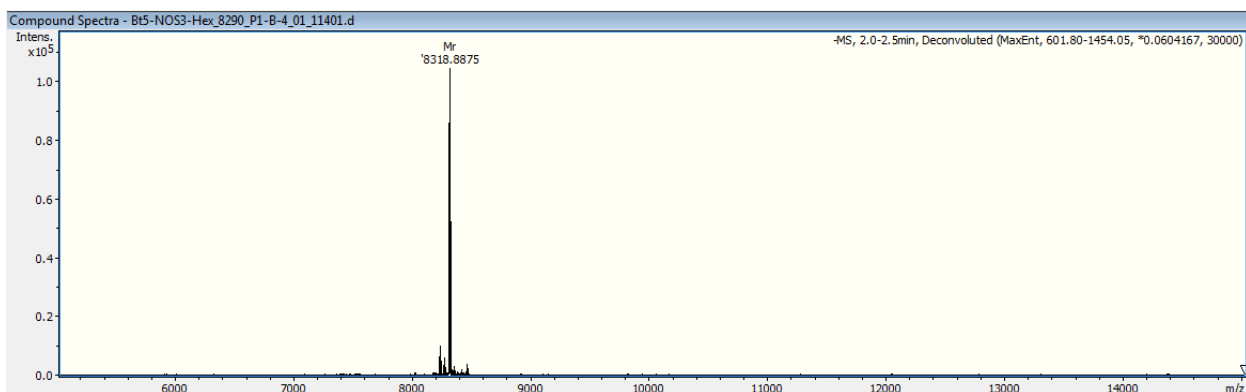



## Oligonucleotide Bg6-NOS3-Fam - HPLC traces and MS data

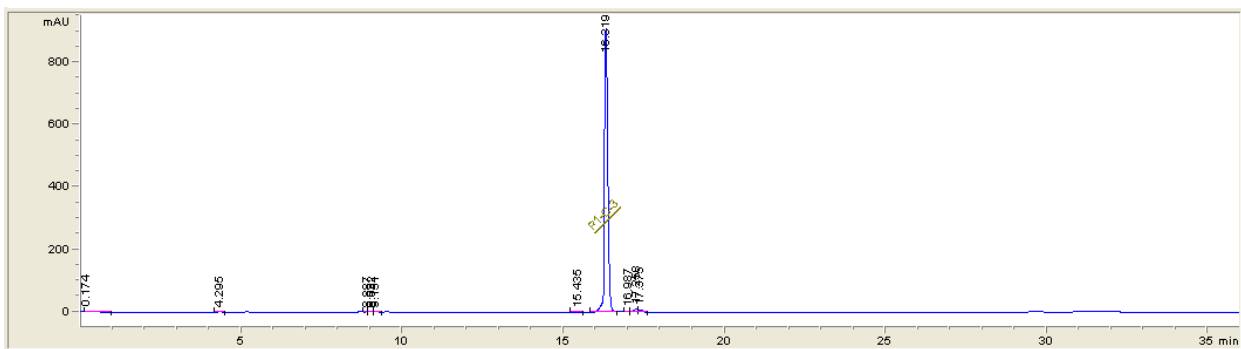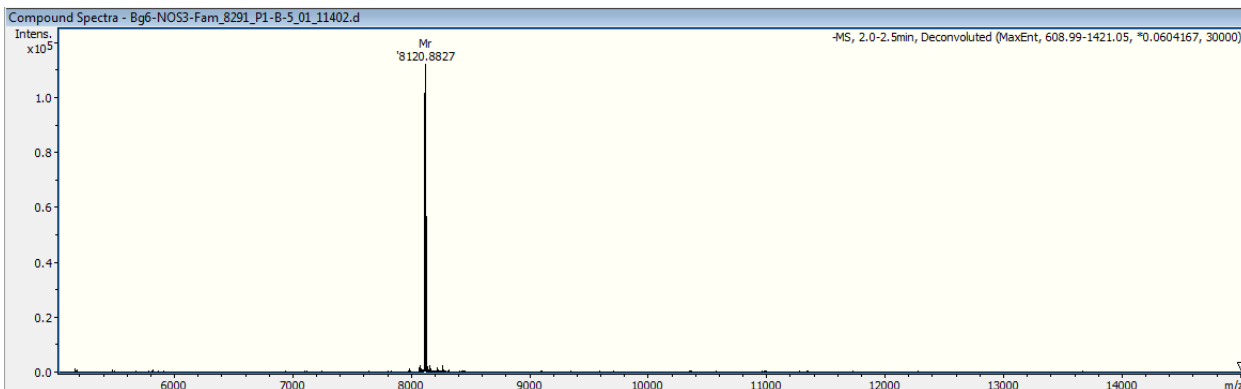

## Oligonucleotide Bt6-NOS3-Hex - HPLC traces and MS data

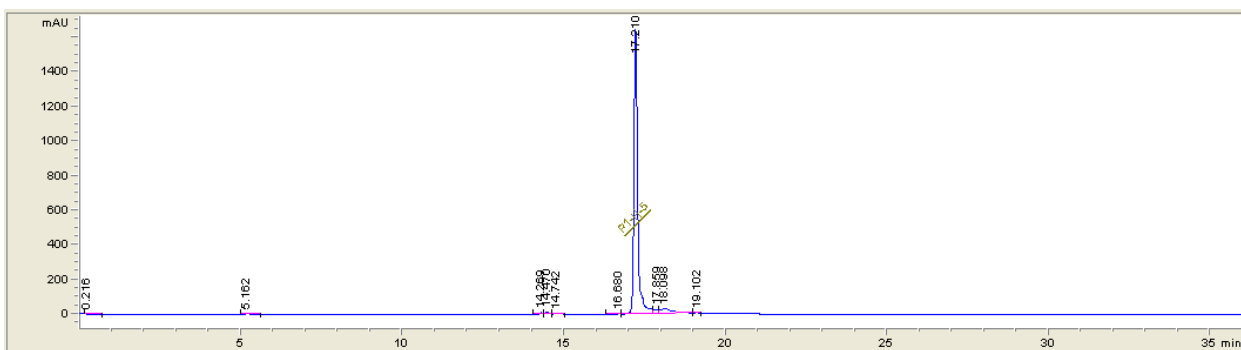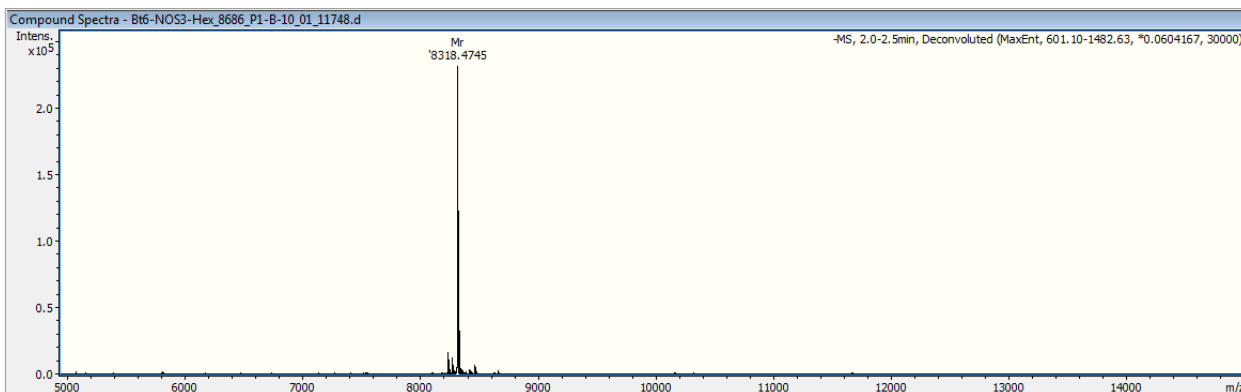

### Oligonucleotide Bg0-FV-Fam - HPLC traces and MS data

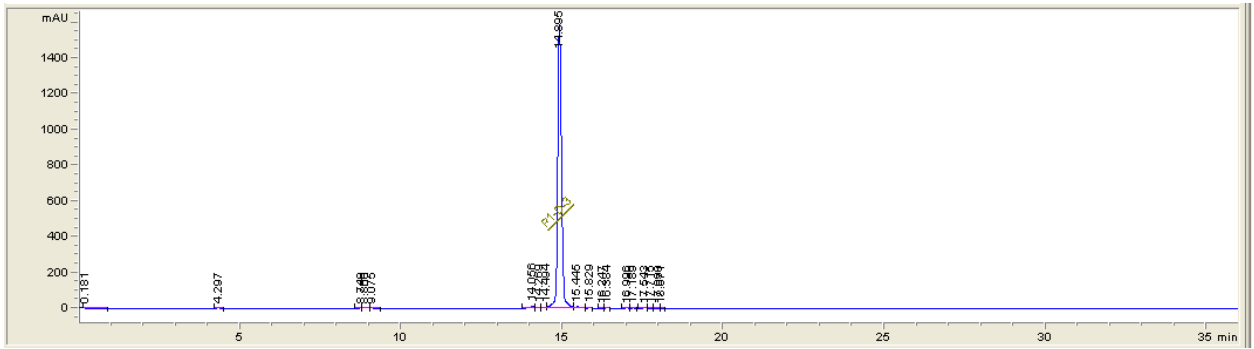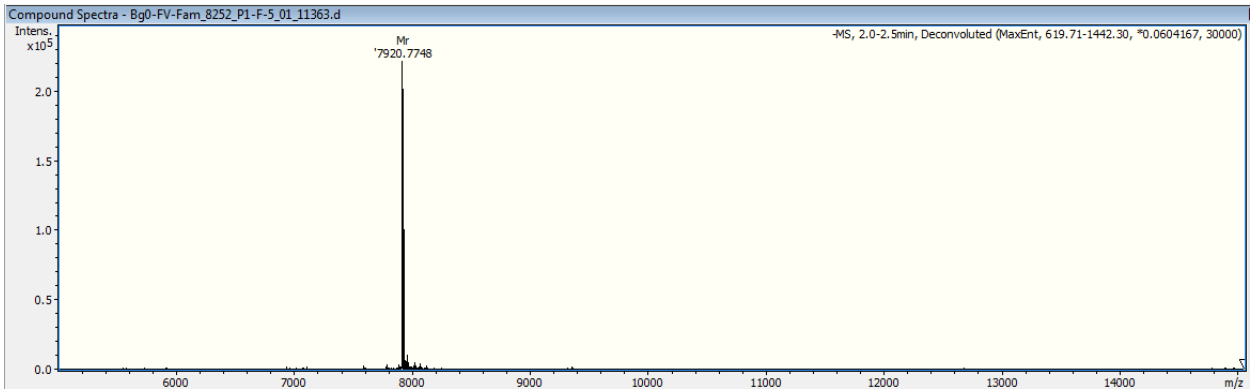

### Oligonucleotide Ba0-FV-Hex - HPLC traces and MS data

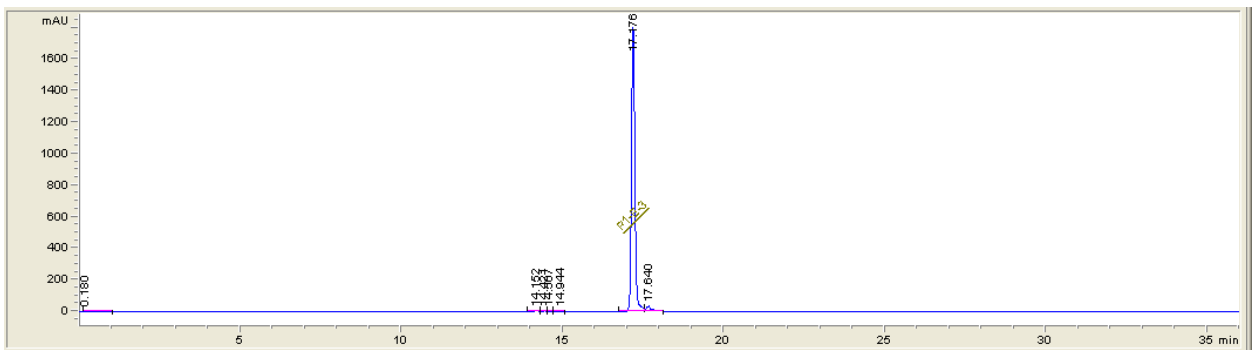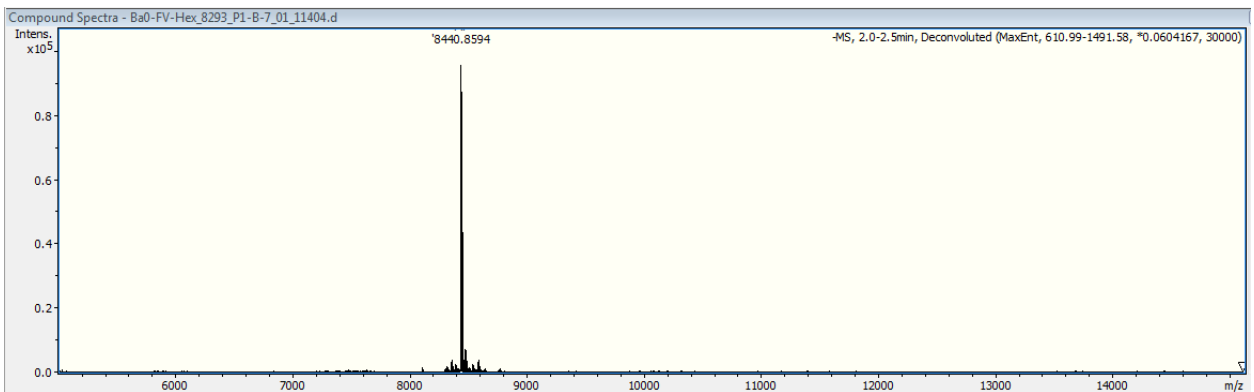

### Oligonucleotide Ba0-FV-R6G - HPLC traces and MS data

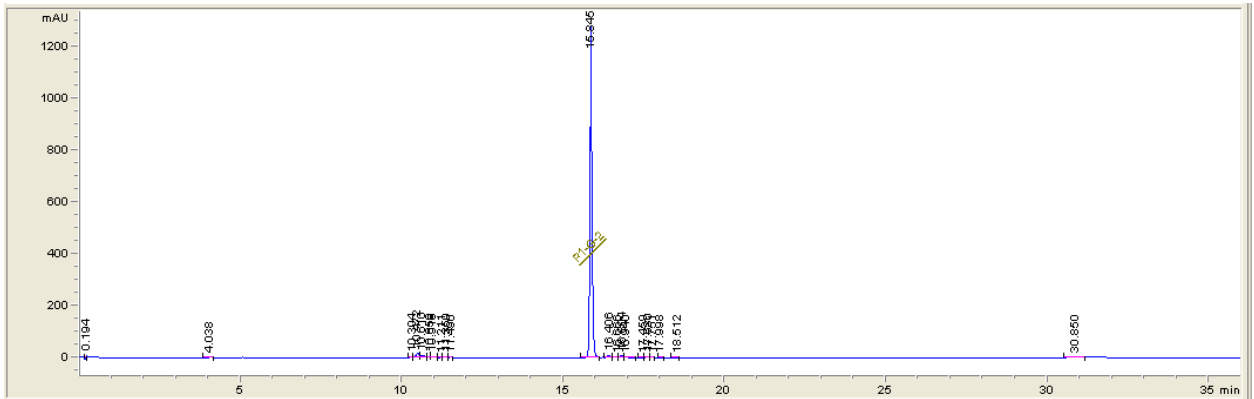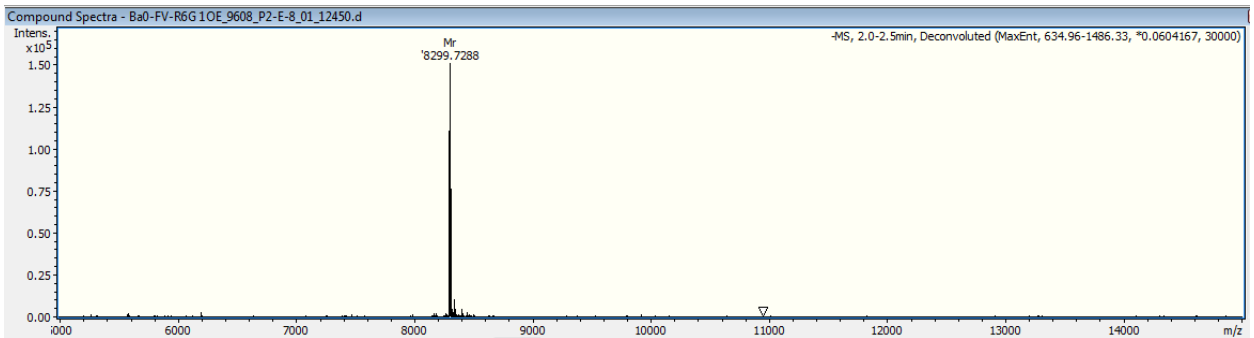

### Oligonucleotide Bg1-FV-Fam - HPLC traces and MS data

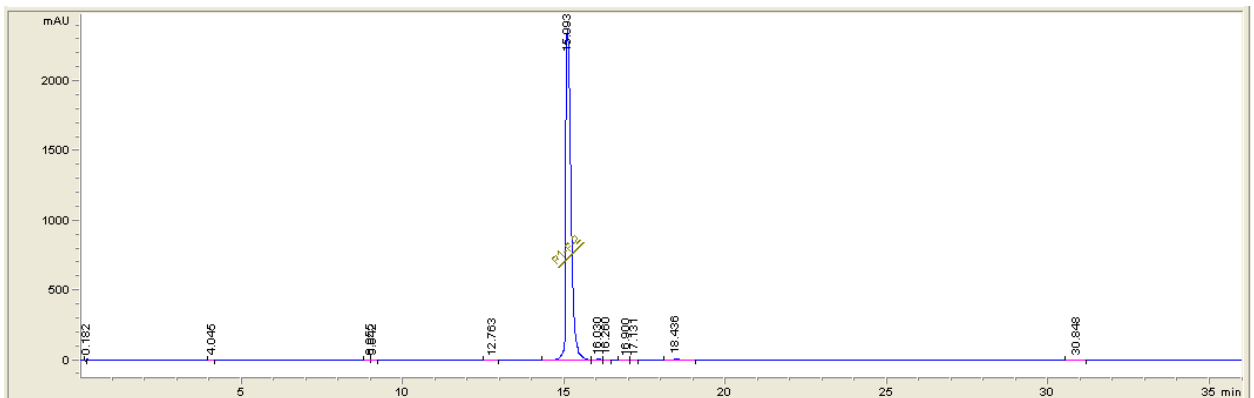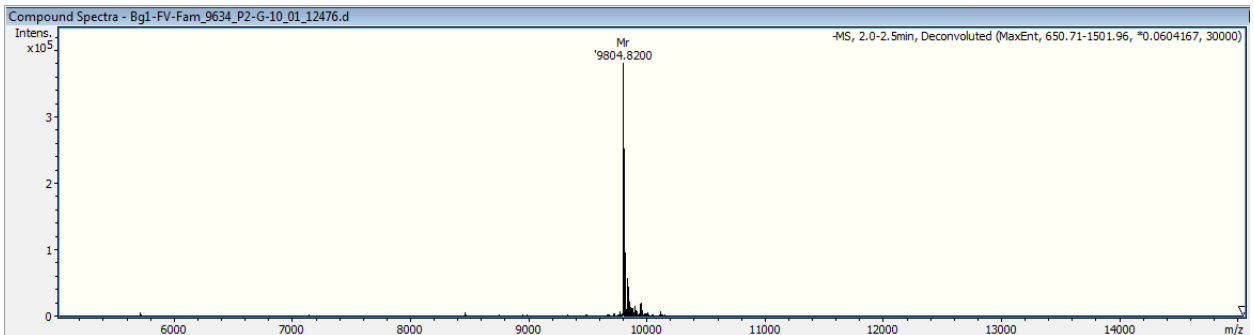

### Oligonucleotide Ba1-FV-Hex - HPLC traces and MS data

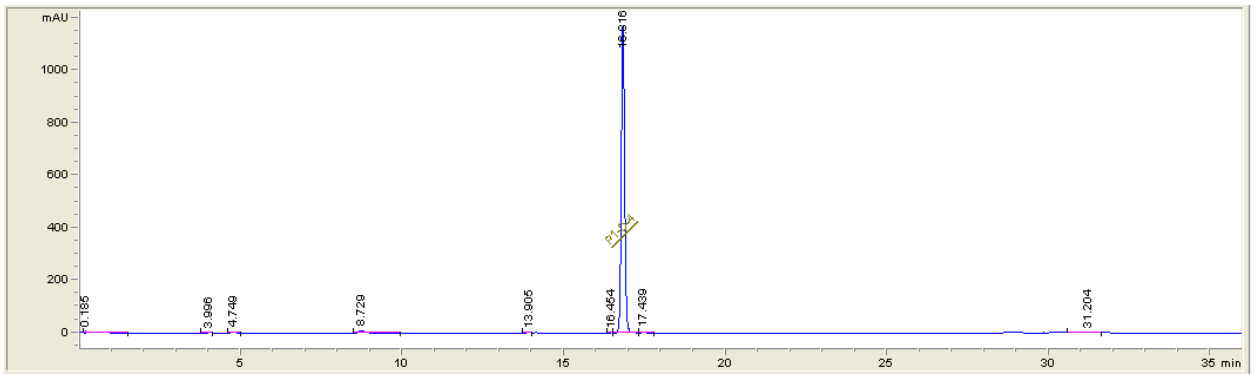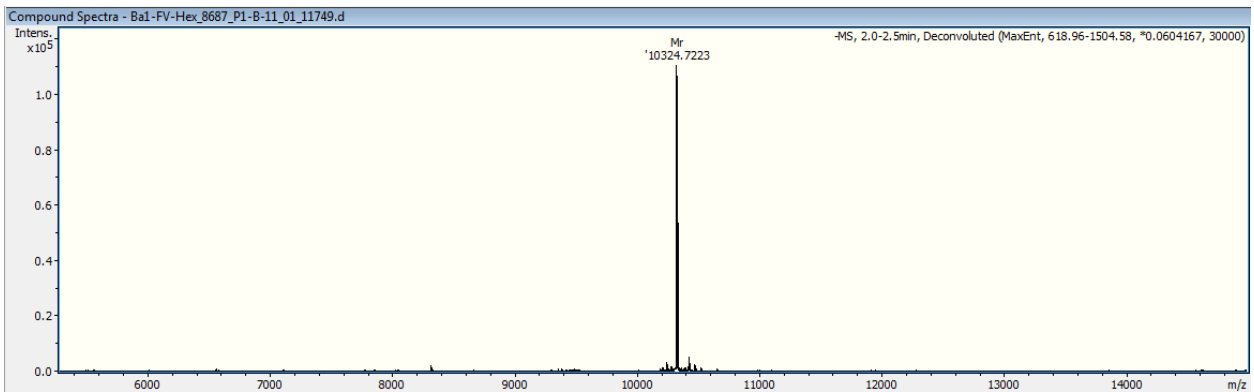

### Oligonucleotide Bg2-FV-Fam - HPLC traces and MS data

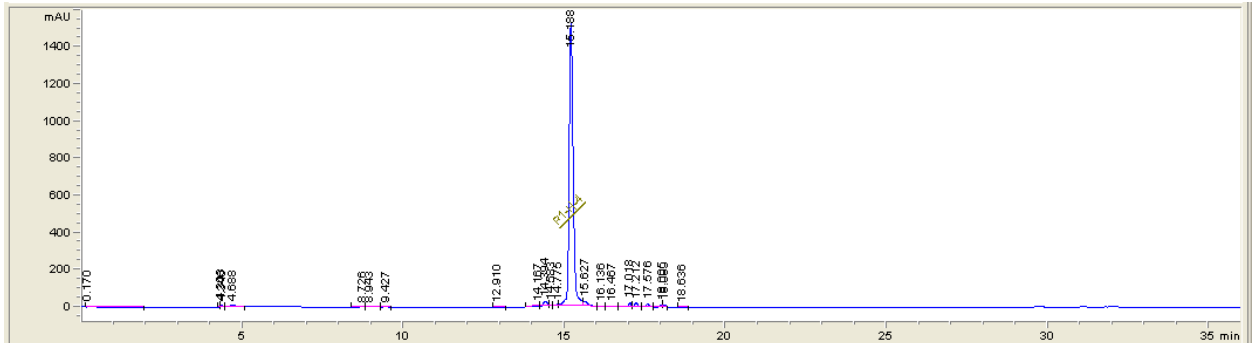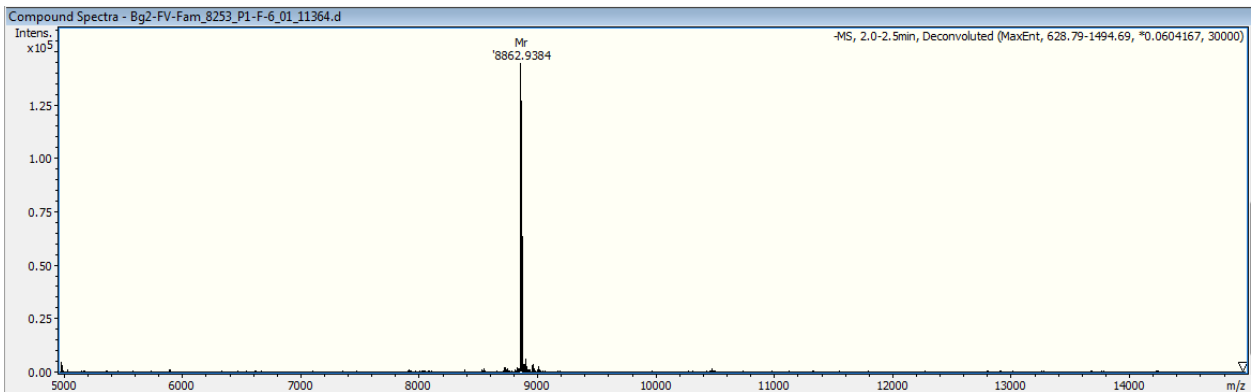

### Oligonucleotide Ba2-FV-Hex - HPLC traces and MS data

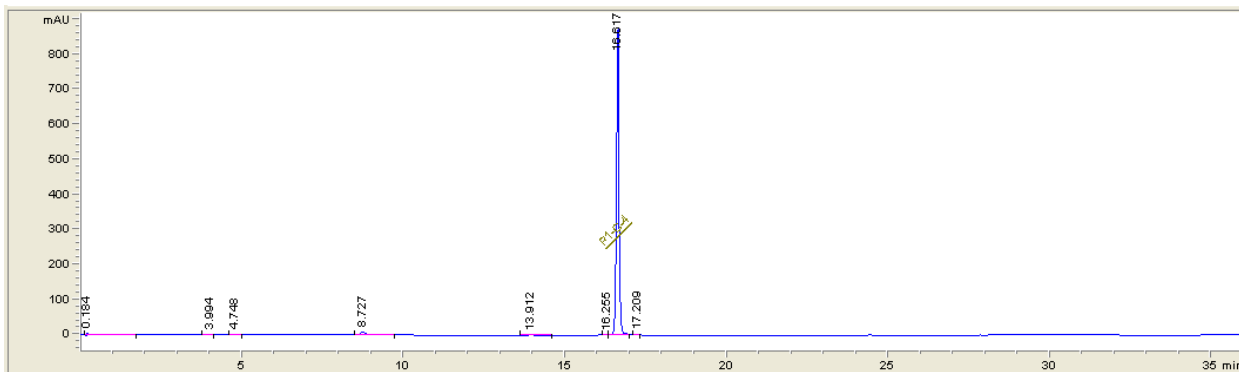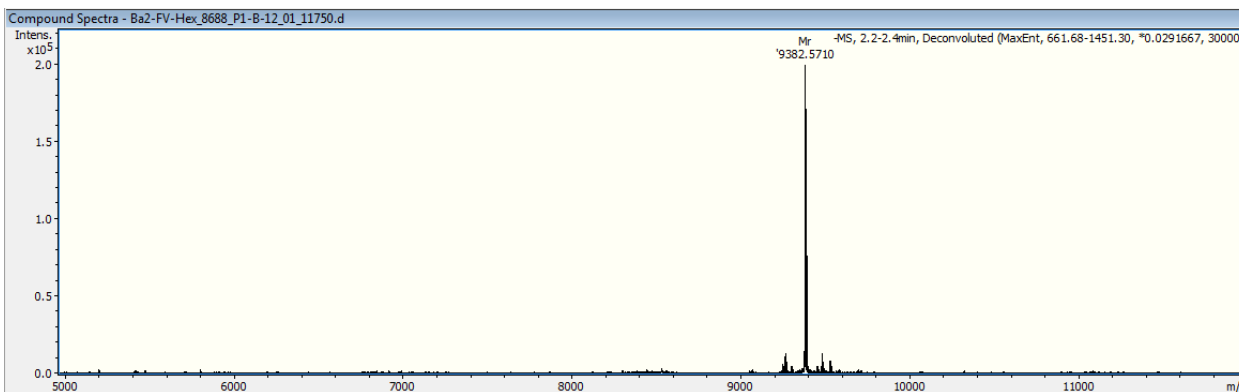

### Oligonucleotide Bg3-FV-Fam - HPLC traces and MS data

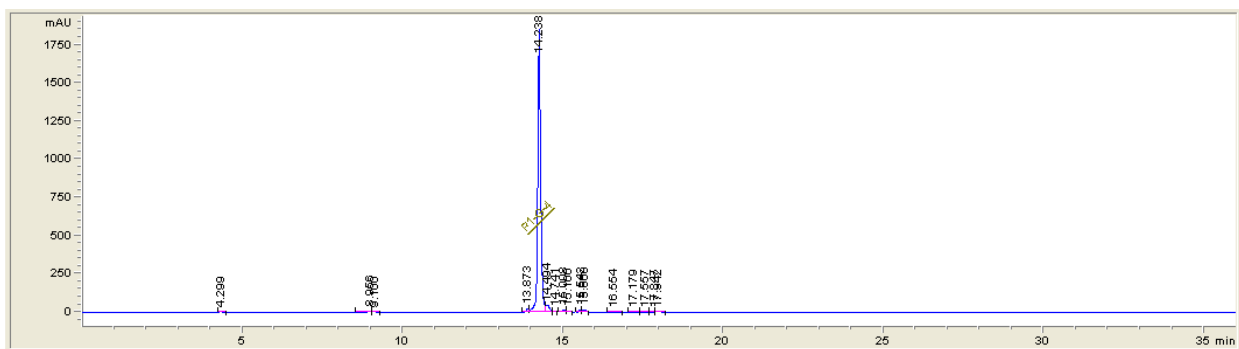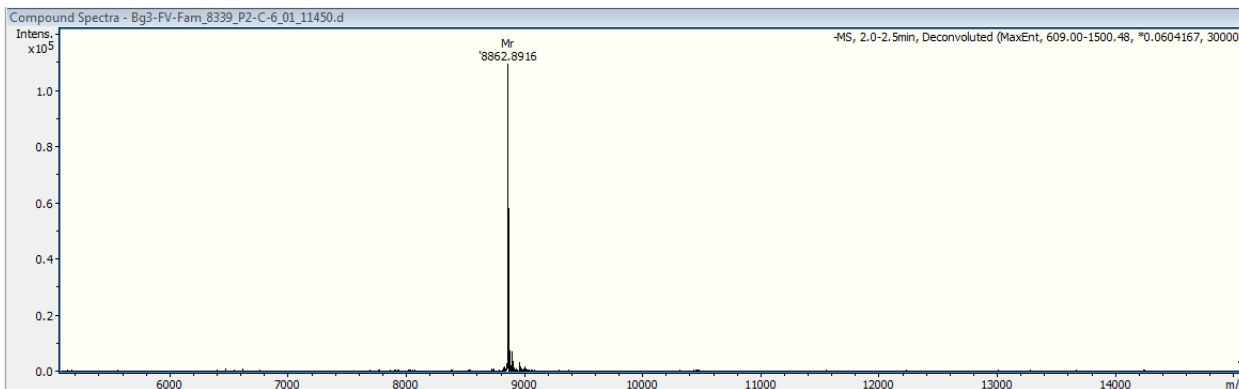

### Oligonucleotide Ba3-FV-Hex - HPLC traces and MS data

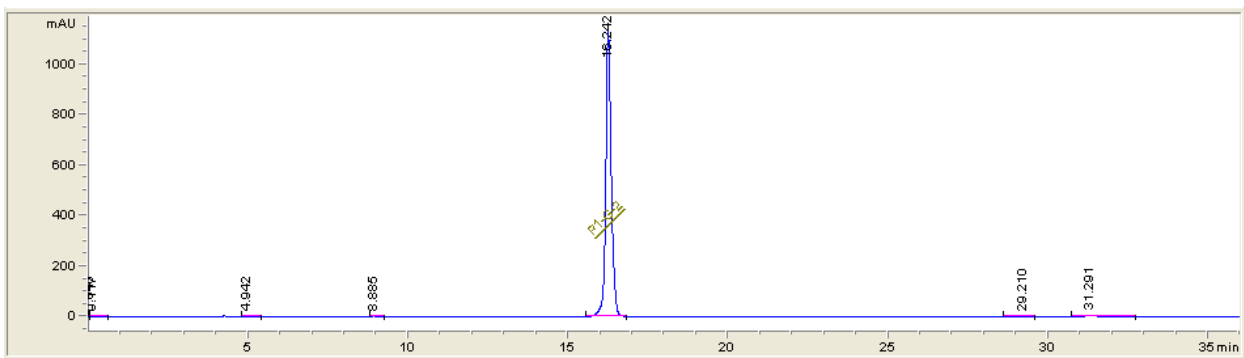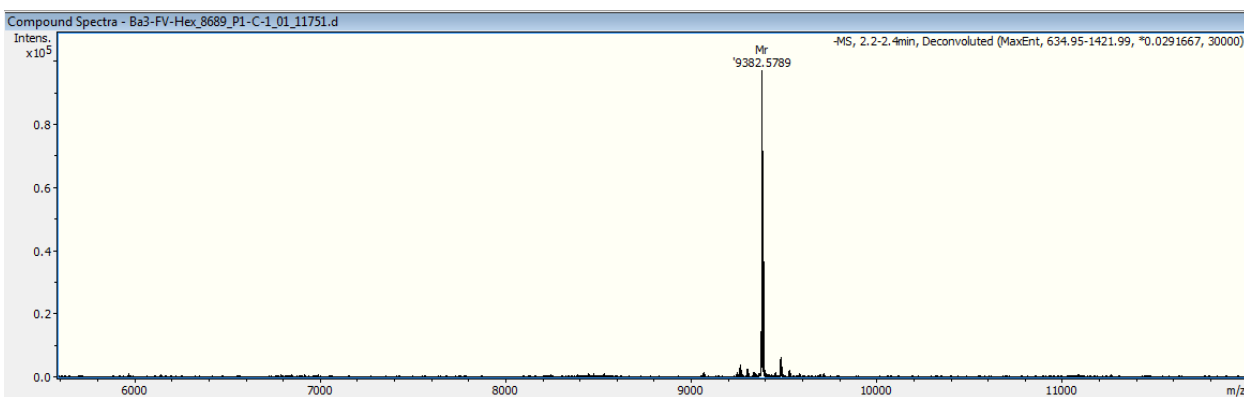

### Oligonucleotide Bg4-FV-Fam - HPLC traces and MS data

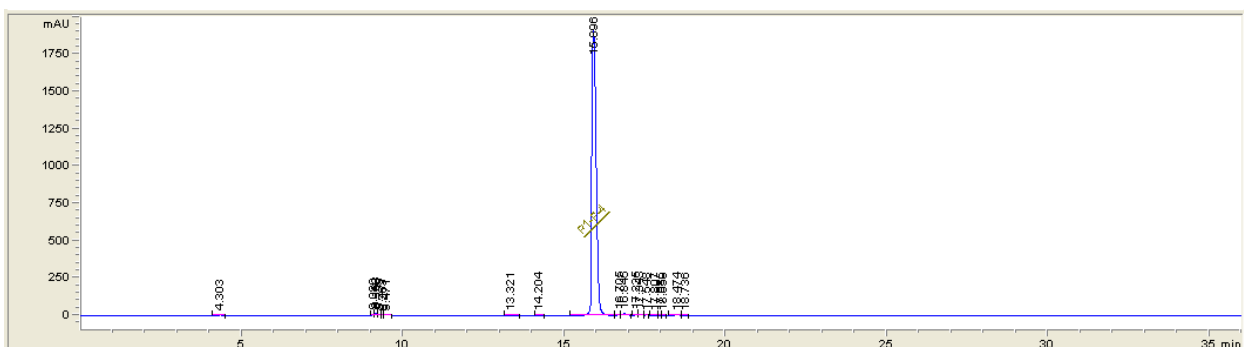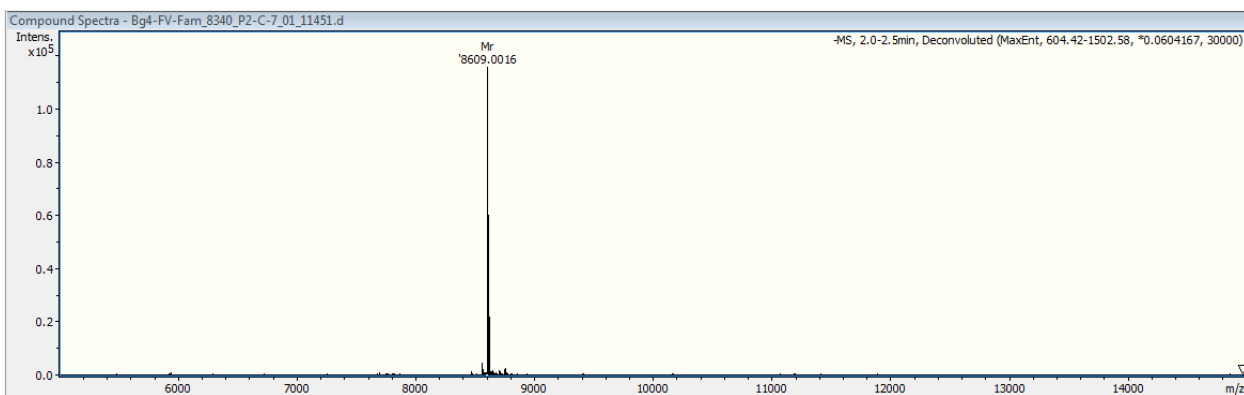

### Oligonucleotide Ba4-FV-Hex - HPLC traces and MS data

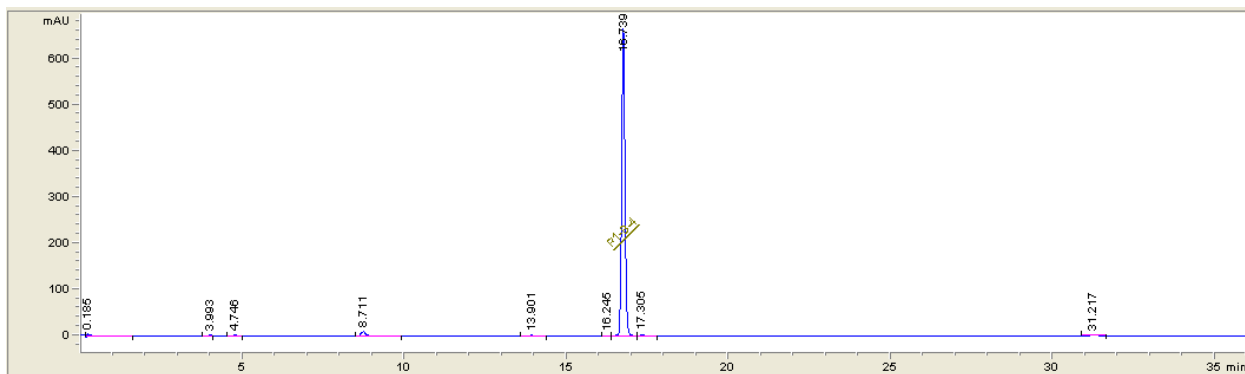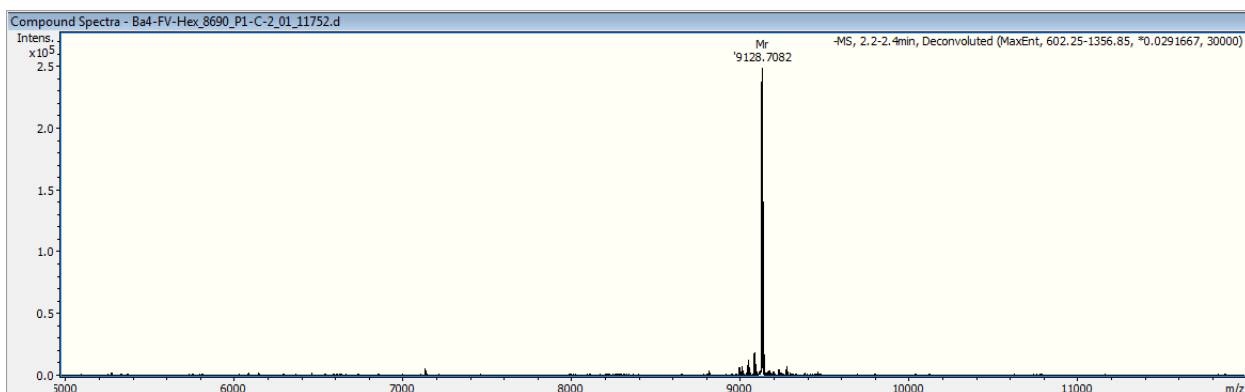

### Oligonucleotide Bg5-FV-Fam - HPLC traces and MS data

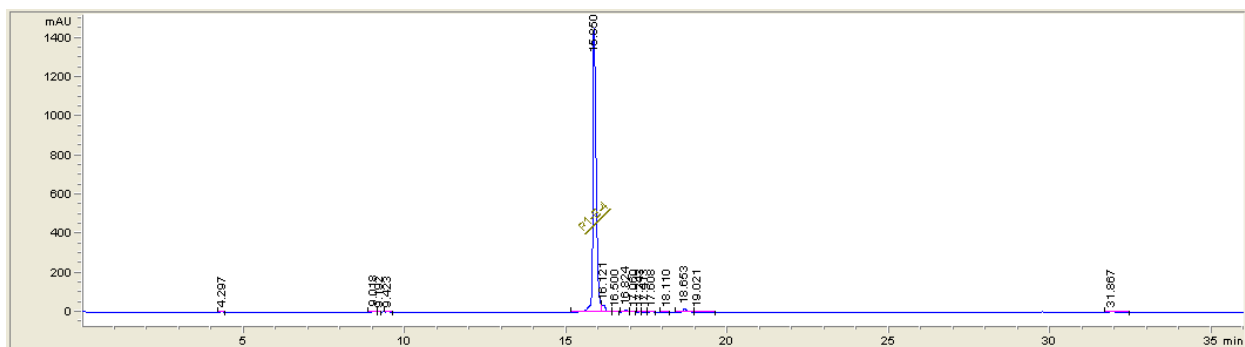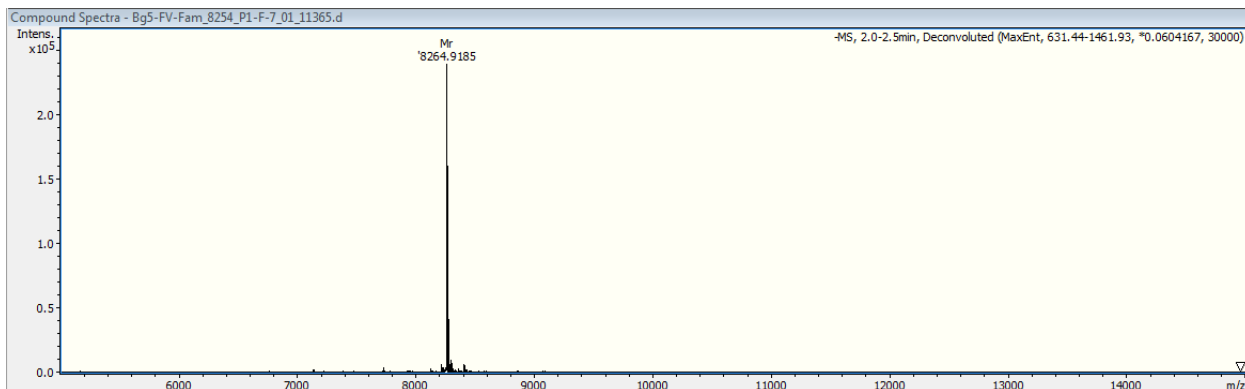

### Oligonucleotide Ba5-FV-Hex - HPLC traces and MS data

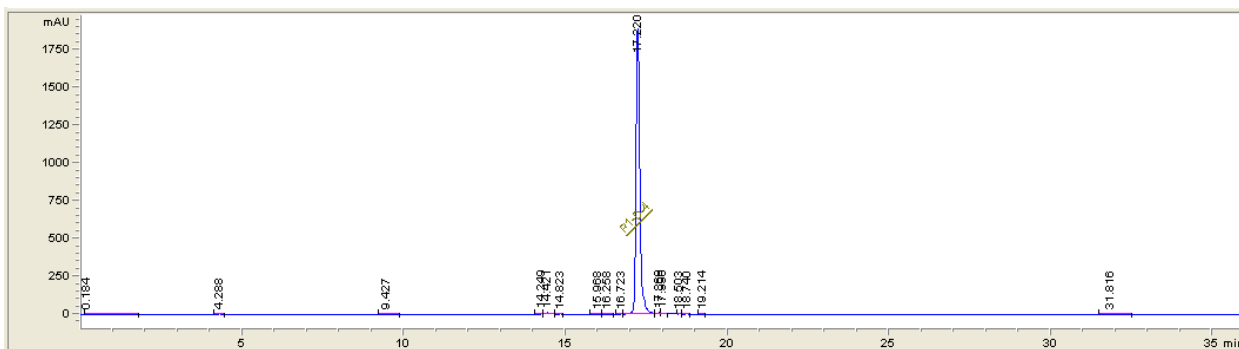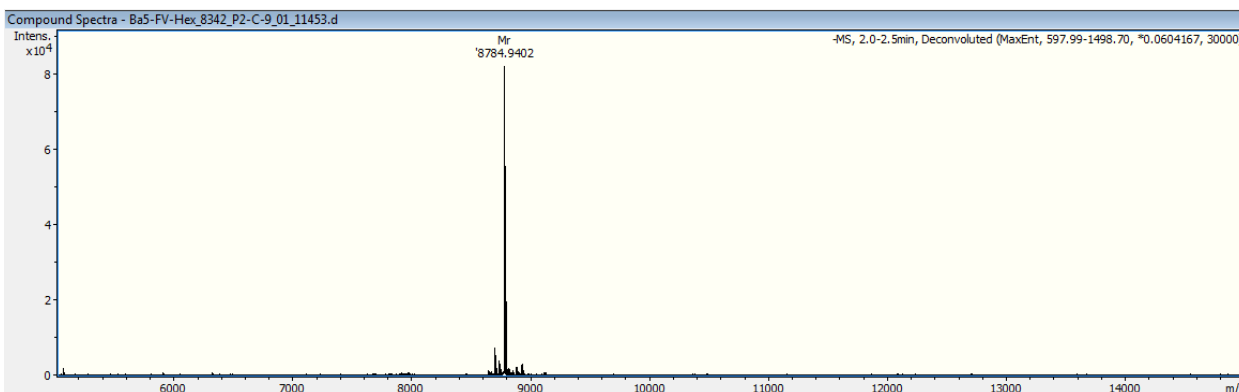

### Oligonucleotide Bg6-FV-Fam - HPLC traces and MS data

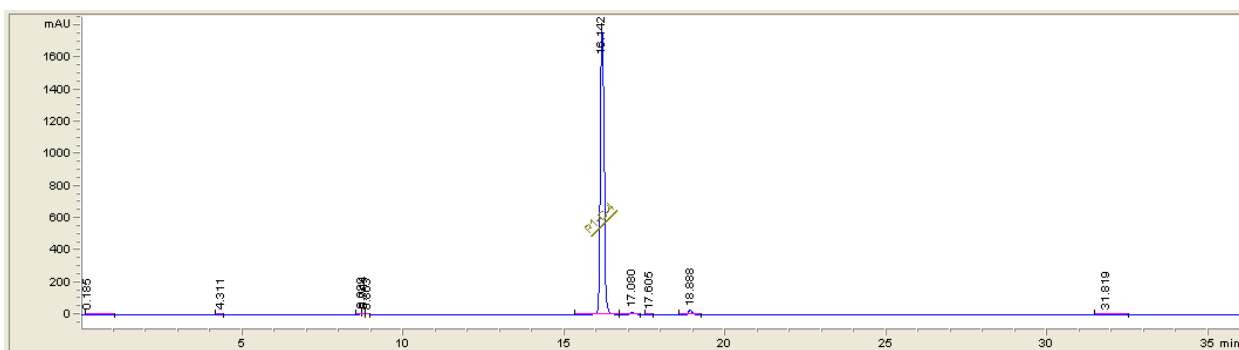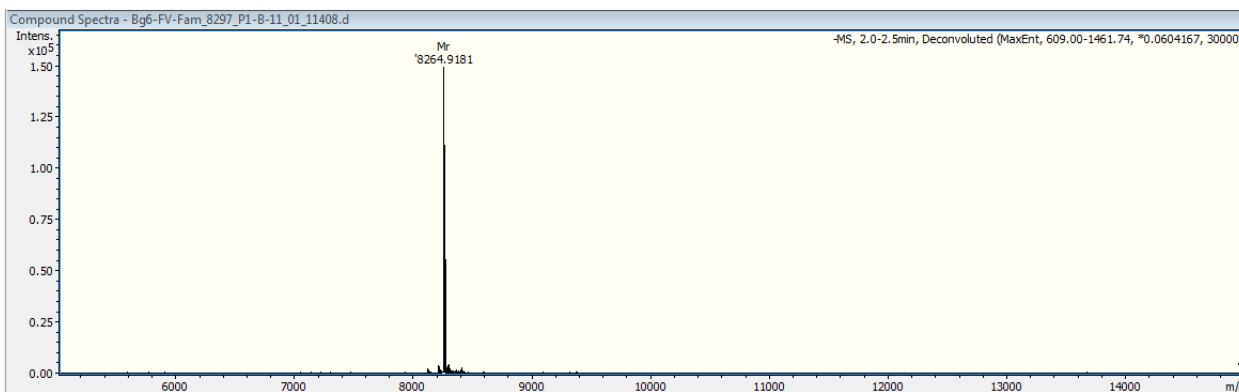



# Oligonucleotide Ba6-FV-Hex - HPLC traces and MS data

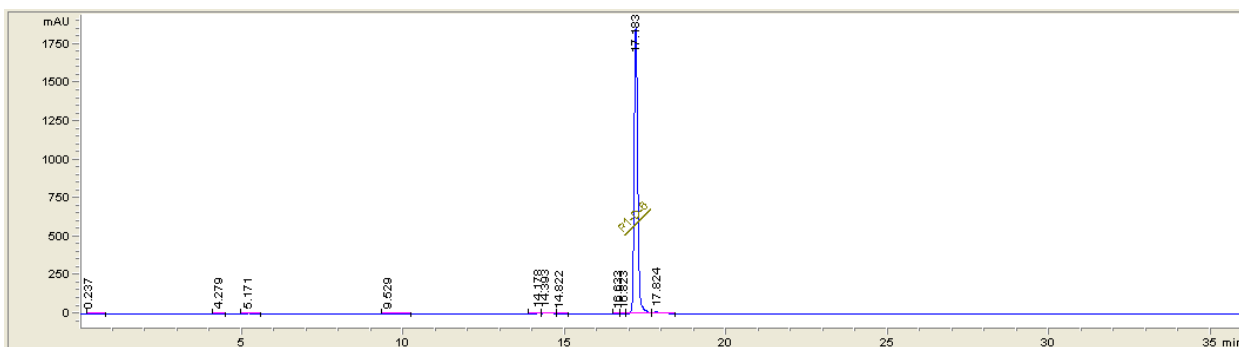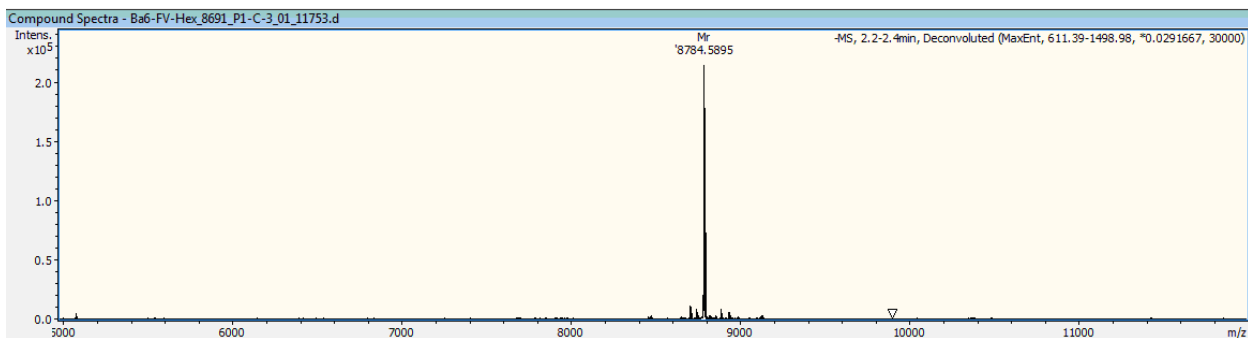

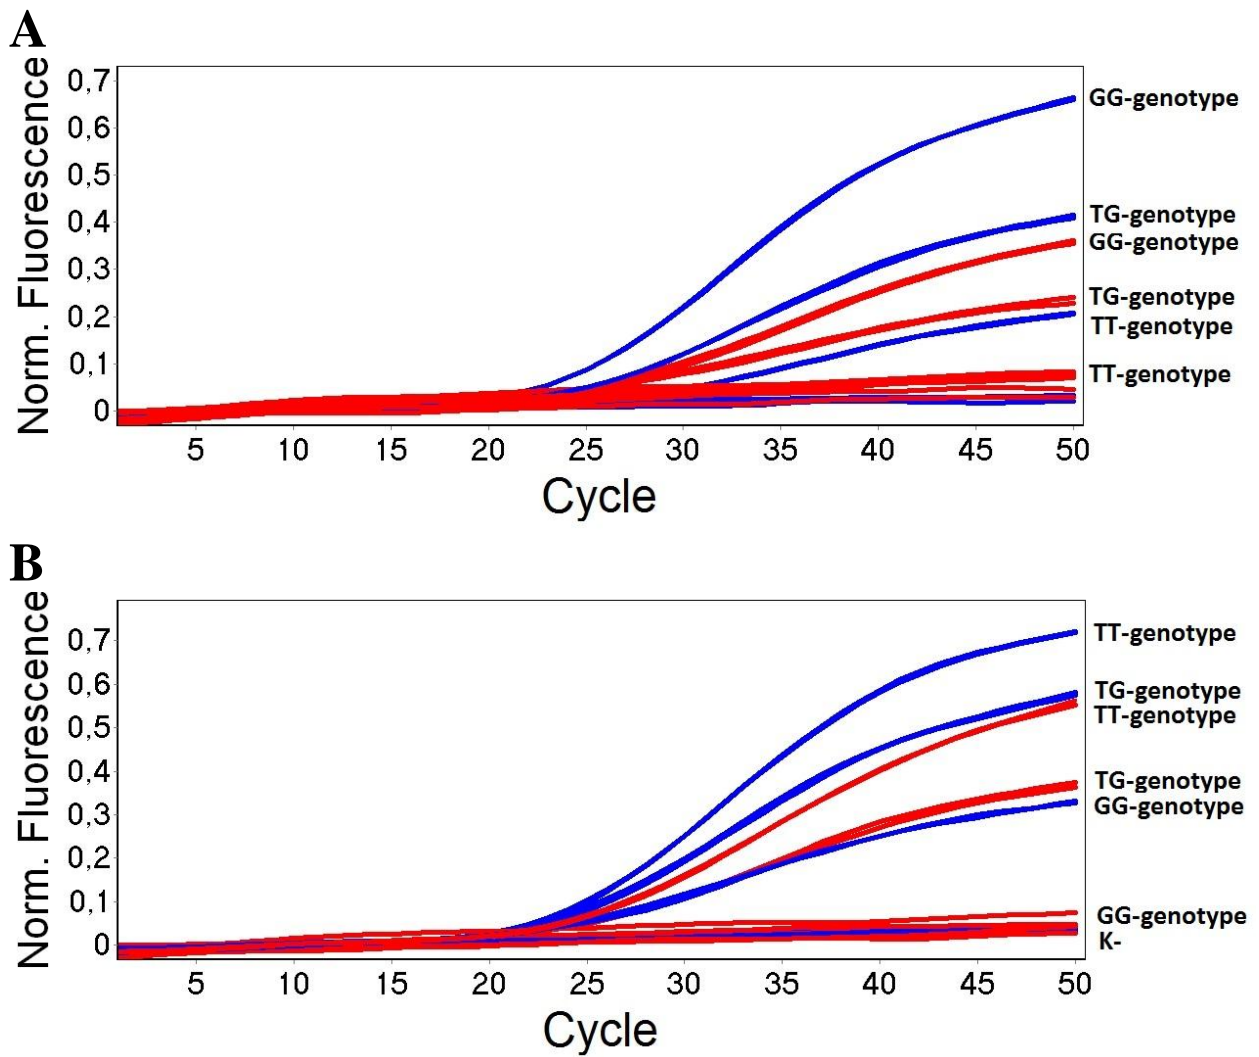

**Figure S1.** qPCR data for NOS3 SNP detection by MBs (blue: classic b0-nos3 MB, red: b4-nos3 MB with Sp18 linkers), A: FAM channel (b0- or b4-nos-Fam MB for GG allele), B : HEX channel (b0- or b4-nos-Hex MB for TT allele). K- is a void sample.

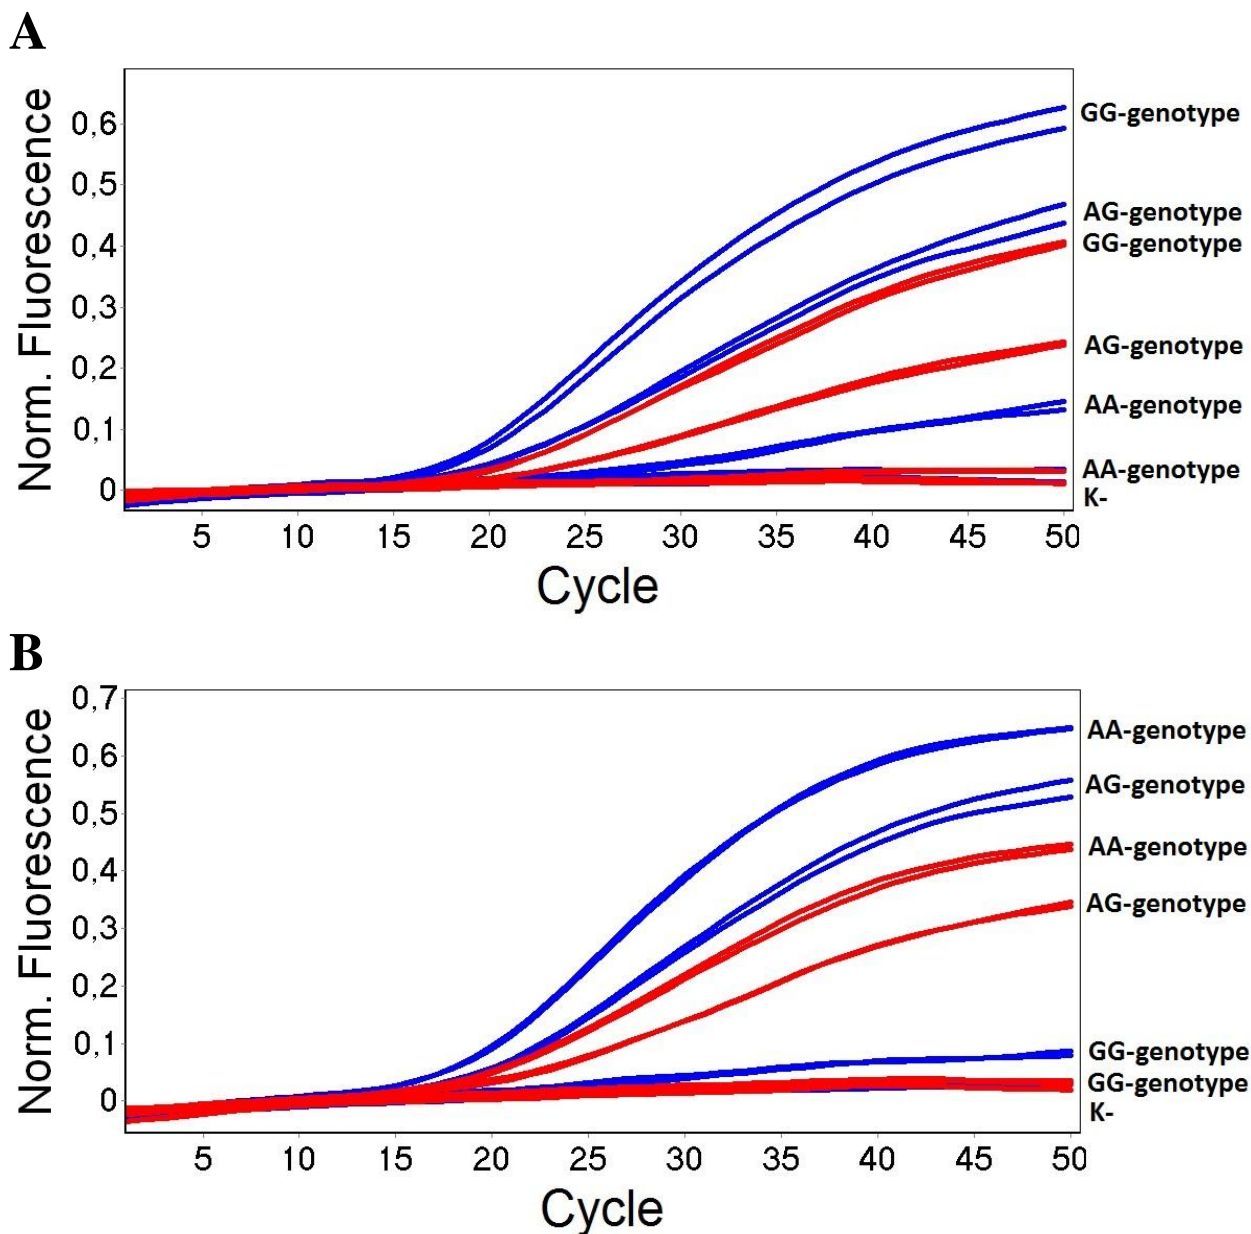

**Figure S2.** qPCR data for ADRB2 SNP detection by MBs (blue: classic b0-adrb2 MB, red: b4-adrb2 MB with Sp18 linkers), A: FAM channel (b0- or b4-adrb-Fam MB for GG allele), B : HEX channel (b0- or b4-FV-Hex MB for AA allele). K- is a void sample.
